# Supplementary material for: Research groups: How big should they be?
Source: PeerJ. 2015 Jun 9;3:e989. doi: 10.7717/peerj.989 (PMC4465944; doi:10.7717/peerj.989)
Supplement: Table S1 [file peerj-03-989-s001.xls]

## Sheet: Sheet1
University	PhDs	Postdocs	technicians	other	no.ofpapers	no.offirstandlastauthorpapers	meanauthors	meanlogauthors	meancitations	meanlogcitations	meanIF	meanlogIF	GroupSize	GroupSizePlusPI	Productivity	LogNoOfPapers	ProportionFirstLastAuthor	PhD_squ	Postdocs_squ	Tech_squ	Other_squ	LogGroupSizePlusPI	LogPhDs	LogPostdocs	LogTechnicians	LogOther	LogNoOfFirstLastAuthorPapers	Log_cost	Cost	Log_meanIF	Log2GroupSizePlusPI	Log2NoOfPapers	MeanLog2IF	MeanLog2Citations
Birkbeck College	3	0	0.5	0	7	3	5.28571	0.706219	13.0286	0.957391	9.82486	0.762494	3.5	4.5	1.55556	0.90309	0.428571	9	0	0.25	0	0.653213	0.60206	0	0.176091	0	0.60206	0.130334	1.875	0.992326	2.16993	3	2.53295	3.18038
Birkbeck College	0.611	0	0.167	0	4	1	7.5	0.855401	1.625	0.294023	4.24725	0.568955	0.778	1.778	2.24972	0.69897	0.25	0.373321	0	0.027889	0	0.249932	0.207096	0	0.0670709	0	0.30103	0.0325382	1.1945	0.628108	0.830256	2.32193	1.89003	0.976723
Birkbeck College	2.5	0	0	0	10	2	6.7	0.815498	6.82333	0.644851	3.9333	0.59116	2.5	3.5	2.85714	1.04139	0.2	6.25	0	0	0	0.544068	0.544068	0	0	0	0.477121	0.09691	1.625	0.594757	1.80736	3.45943	1.96379	2.14215
Cranfield University	5	2	0	0	13	11	4.15385	0.568916	5.06282	0.635358	2.146	0.320634	7	8	1.625	1.14613	0.846154	25	4	0	0	0.90309	0.778151	0.477121	0	0	1.07918	0.230449	2.75	0.33163	3	3.80736	1.06512	2.11061
Imperial College London	1	1	0	0	9	6	4.66667	0.501172	3.43889	0.60318	5.94133	0.717334	2	3	3	1	0.666667	1	1	0	0	0.477121	0.30103	0.30103	0	0	0.845098	0.0791812	1.5	0.773884	1.58496	3.32193	2.38293	2.00372
Imperial College London	0	0	2	0	6	2	12.6667	0.99218	12.2167	0.864058	14.4987	0.960739	2	3	2	0.845098	0.333333	0	0	4	0	0.477121	0	0	0.477121	0	0.477121	0.0791812	1.5	1.16133	1.58496	2.80736	3.19151	2.87034
Imperial College London	5	1.5	1	0	38	23	12	0.666404	10.3947	0.923609	8.33034	0.792808	7.5	8.5	4.47059	1.59106	0.605263	25	2.25	1	0	0.929419	0.778151	0.39794	0.30103	0	1.38021	0.243038	2.875	0.920663	3.08746	5.28541	2.63365	3.06817
Imperial College London	1	2.7	0.8	1	16	4	21.625	0.78631	14.7312	0.96138	14.0465	0.967521	5.5	6.5	2.46154	1.23045	0.25	1	7.29	0.64	1	0.812913	0.30103	0.568202	0.255273	0.30103	0.69897	0.190332	2.375	1.14757	2.70044	4.08747	3.21404	3.19364
Imperial College London	0	2	1	0	18	9	6.55556	0.734636	3.75926	0.550159	4.61939	0.620931	3	4	4.5	1.27875	0.5	0	4	1	0	0.60206	0	0.477121	0.30103	0	1	0.113943	1.75	0.664585	2	4.24793	2.06269	1.82759
Imperial College London	4	4	1	0	33	19	13.1515	0.753435	19.6126	0.817409	8.83942	0.764317	9	10	3.3	1.53148	0.575758	16	16	1	0	1	0.69897	0.69897	0.30103	0	1.30103	0.278754	3.25	0.946424	3.32193	5.08747	2.53901	2.71538
Imperial College London	3.5	1	0.2	0	26	13	5.69231	0.721009	7.42949	0.686033	4.65969	0.630256	4.7	5.7	4.5614	1.43136	0.5	12.25	1	0.04	0	0.755875	0.653213	0.30103	0.0791812	0	1.14613	0.167317	2.175	0.668357	2.51096	4.75489	2.09367	2.27895
Imperial College London	0	1.5	0	0	20	9	3.1	0.442423	11.2675	0.875725	6.14155	0.697155	1.5	2.5	8	1.32222	0.45	0	2.25	0	0	0.39794	0	0.39794	0	0	1	0.0606978	1.375	0.788278	1.32193	4.39232	2.3159	2.9091
Imperial College London	5	2	0	0	35	14	13.1714	0.773542	12.3067	0.952006	7.07151	0.713297	7	8	4.375	1.5563	0.4	25	4	0	0	0.90309	0.778151	0.477121	0	0	1.17609	0.230449	2.75	0.849512	3	5.16993	2.36952	3.1625
Institute of Cancer Research	3	2	2	2	75	0	13.96	1.07817	5.47378	0.456341	7.34812	0.80483	9	10	7.5	1.88081	0	9	4	4	4	1	0.60206	0.477121	0.477121	0.477121	0	0.278754	3.25	0.866176	3.32193	6.24793	2.67359	1.51593
Institute of Cancer Research	3.5	3	2	0	27	19	11.4815	0.873825	8.24198	0.824067	5.04669	0.665673	8.5	9.5	2.84211	1.44716	0.703704	12.25	9	4	0	0.977724	0.653213	0.60206	0.477121	0	1.30103	0.267172	3.125	0.703007	3.24793	4.80736	2.21132	2.73749
Institute of Cancer Research	4	3	4	0	13	3	12.4615	1.01147	9.49487	0.778146	10.1107	0.900947	11	12	1.08333	1.14613	0.230769	16	9	16	0	1.07918	0.69897	0.60206	0.69897	0	0.60206	0.322219	3.75	1.00478	3.58496	3.80736	2.99288	2.58495
Institute of Cancer Research	1	0	1	0	109	15	11.8899	1.03467	7.95887	0.545937	7.21386	0.770523	2	3	36.3333	2.04139	0.137615	1	0	1	0	0.477121	0.30103	0	0.30103	0	1.20412	0.0791812	1.5	0.858168	1.58496	6.78136	2.55962	1.81357
Institute of Cancer Research	3	4	0	3	177	60	8.51977	0.871231	5.1145	0.565794	6.84308	0.682138	10	11	16.0909	2.25042	0.338983	9	16	0	9	1.04139	0.60206	0.69897	0	0.60206	1.78533	0.30103	3.5	0.835251	3.45943	7.47574	2.26602	1.87953
Institute of Zoology	2	0.5	0.5	0	12	9	6.91667	0.79358	2.44583	0.47332	2.08733	0.280355	3	4	3	1.11394	0.75	4	0.25	0.25	0	0.60206	0.477121	0.176091	0.176091	0	1	0.113943	1.75	0.319592	2	3.70044	0.931318	1.57234
Institute of Zoology	6	0.3	0	0	5	1	5	0.691878	3.76	0.580999	8.561	0.641541	6.3	7.3	0.684932	0.778151	0.2	36	0.09	0	0	0.863323	0.845098	0.113943	0	0	0.30103	0.212188	2.575	0.932524	2.8679	2.58496	2.13115	1.93004
Oxford Brookes	2	2	0	0	5	4	5	0.691878	6.13333	0.629613	3.55275	0.534964	4	5	1	0.778151	0.8	4	4	0	0	0.69897	0.477121	0.477121	0	0	0.69897	0.146128	2	0.550565	2.32193	2.58496	1.77711	2.09153
Oxford Brookes	1	1	0.2	0	13	12	2.92308	0.447837	4.96154	0.511532	3.56654	0.486054	2.2	3.2	4.0625	1.14613	0.923077	1	1	0.04	0	0.50515	0.30103	0.30103	0.0791812	0	1.11394	0.0863598	1.55	0.552247	1.67807	3.80736	1.61464	1.69927
Roehampton University	1.5	0	0	0	35	27	4.34286	0.584187	3.5281	0.497557	3.05917	0.405602	1.5	2.5	14	1.5563	0.771429	2.25	0	0	0	0.39794	0.39794	0	0	0	1.44716	0.0606978	1.375	0.485604	1.32193	5.16993	1.34738	1.65285
Roehampton University	3.5	0	0.1	0	28	20	4.14286	0.587326	2.86429	0.481062	2.47868	0.337159	3.6	4.6	6.08696	1.4624	0.714286	12.25	0	0.01	0	0.662758	0.653213	0	0.0413927	0	1.32222	0.133539	1.9	0.39422	2.20164	4.85798	1.12002	1.59805
Royal Holloway	7.5	0.5	0.2	0	21	9	6.47619	0.668418	4.44841	0.615687	2.9421	0.431893	8.2	9.2	2.28261	1.34242	0.428571	56.25	0.25	0.04	0	0.963788	0.929419	0.176091	0.0791812	0	1	0.260071	3.05	0.468657	3.20164	4.45943	1.43472	2.04527
Royal Holloway	1	0	0	0	8	0	7.375	0.749887	5.72708	0.661943	6.44975	0.737094	1	2	4	0.954243	0	1	0	0	0	0.30103	0.30103	0	0	0	0	0.0413927	1.25	0.809543	1	3.16993	2.44857	2.19893
Royal Holloway	2	2	1	0	83	53	9.40964	0.87256	4.54779	0.326959	5.00921	0.632574	5	6	13.8333	1.92428	0.638554	4	4	1	0	0.778151	0.477121	0.477121	0.30103	0	1.73239	0.176091	2.25	0.699769	2.58496	6.39232	2.10137	1.08614
Royal Holloway	1.5	2	0.2	0	14	4	8.35714	0.839339	13.1262	1.01986	6.73429	0.786354	3.7	4.7	2.97872	1.17609	0.285714	2.25	4	0.04	0	0.672098	0.39794	0.477121	0.0791812	0	0.69897	0.136721	1.925	0.828292	2.23266	3.90689	2.61221	3.38789
Royal Holloway	4	1	0.5	0	20	9	5	0.645725	8.63917	0.730378	6.789	0.773824	5.5	6.5	3.07692	1.32222	0.45	16	1	0.25	0	0.812913	0.69897	0.30103	0.176091	0	1	0.190332	2.375	0.831806	2.70044	4.39232	2.57059	2.42626
Royal Holloway	6	3	2	0	14	9	5.92857	0.731269	4.48333	0.647945	3.4155	0.46032	11	12	1.16667	1.17609	0.642857	36	9	4	0	1.07918	0.845098	0.60206	0.477121	0	1	0.322219	3.75	0.533454	3.58496	3.90689	1.52915	2.15243
Royal Holloway	1.02	0	0	0	4	1	5.75	0.73107	4.05417	0.593611	5.0345	0.649923	1.02	2.02	1.9802	0.69897	0.25	1.0404	0	0	0	0.305351	0.305351	0	0	0	0.30103	0.0421816	1.255	0.701956	1.01436	2.32193	2.159	1.97193
University of Bath	0	0.5	0	0	20	9	7.65	0.807723	4.76917	0.527184	6.34605	0.647542	0.5	1.5	13.3333	1.32222	0.45	0	0.25	0	0	0.176091	0	0.176091	0	0	1	0.0211893	1.125	0.802503	0.584963	4.39232	2.15109	1.75127
University of Bath	6	0	0	0	3	3	3.33333	0.518768	2.1	0.484948	7.23667	0.82336	6	7	0.428571	0.60206	1	36	0	0	0	0.845098	0.845098	0	0	0	0.60206	0.20412	2.5	0.859539	2.80736	2	2.73514	1.61096
University of Bath	0	1	0	0	12	4	7.41667	0.843685	3.93056	0.536452	3.61933	0.542152	1	2	6	1.11394	0.333333	0	1	0	0	0.30103	0	0.30103	0	0	0.69897	0.0413927	1.25	0.558629	1	3.70044	1.80099	1.78206
University of Bath	1	1	0	0	41	27	4.34146	0.545597	5.3122	0.719873	3.61057	0.534676	2	3	13.6667	1.62325	0.658537	1	1	0	0	0.477121	0.30103	0.30103	0	0	1.44716	0.0791812	1.5	0.557576	1.58496	5.39232	1.77616	2.39137
University of Bath	4	0	0	0	43	30	4.5814	0.545347	4.77713	0.634169	14.1923	0.969426	4	5	8.6	1.64345	0.697674	16	0	0	0	0.69897	0.69897	0	0	0	1.49136	0.146128	2	1.15205	2.32193	5.45943	3.22037	2.10667
University of Bath	5	1	1	0	12	5	5.33333	0.69074	2.56389	0.456002	5.02417	0.569432	7	8	1.5	1.11394	0.416667	25	1	1	0	0.90309	0.778151	0.30103	0.30103	0	0.778151	0.230449	2.75	0.701064	3	3.70044	1.89161	1.51481
University of Bath	2.5	0	0	0	26	16	4.57692	0.586196	4.31154	0.548989	4.45416	0.586757	2.5	3.5	7.42857	1.43136	0.615385	6.25	0	0	0	0.544068	0.544068	0	0	0	1.23045	0.09691	1.625	0.648766	1.80736	4.75489	1.94917	1.8237
University of Birmingham	7	2	1	0	39	22	4.28205	0.58341	4.25427	0.57363	4.53887	0.618201	10	11	3.54545	1.60206	0.564103	49	4	1	0	1.04139	0.90309	0.477121	0.30103	0	1.36173	0.30103	3.5	0.656948	3.45943	5.32193	2.05362	1.90556
University of Birmingham	1	0	1	1	8	6	6	0.722156	8.40833	0.811375	8.54462	0.844732	3	4	2	0.954243	0.75	1	0	1	1	0.60206	0.30103	0	0.30103	0.30103	0.845098	0.113943	1.75	0.931693	2	3.16993	2.80614	2.69533
University of Birmingham	4	3	0.5	0	23	13	6.13043	0.647429	7.27899	0.717725	4.7383	0.560123	7.5	8.5	2.70588	1.38021	0.565217	16	9	0.25	0	0.929419	0.69897	0.60206	0.176091	0	1.14613	0.243038	2.875	0.675623	3.08746	4.58497	1.86069	2.38423
University of Birmingham	5	7	0	0	48	24	8.70833	0.837481	6.71007	0.654989	4.2411	0.57535	12	13	3.69231	1.6902	0.5	25	49	0	0	1.11394	0.778151	0.90309	0	0	1.39794	0.342423	4	0.627479	3.70044	5.61471	1.91127	2.17583
University of Bristol - Biochem	3	3	0.15	1	20	17	6.4	0.754478	3.51833	0.537924	5.18345	0.662808	7.15	8.15	2.45399	1.32222	0.85	9	9	0.0225	1	0.911158	0.60206	0.60206	0.0606978	0.30103	1.25527	0.234264	2.7875	0.714619	3.0268	4.39232	2.2018	1.78694
University of Bristol - Biochem	2.33	2	0	0	13	6	5.23077	0.67808	4.6	0.643837	9.19092	0.839342	4.33	5.33	2.43902	1.14613	0.461538	5.4289	4	0	0	0.726727	0.522444	0.477121	0	0	0.845098	0.156246	2.0825	0.963359	2.41414	3.80736	2.78824	2.13878
University of Bristol - Biochem	1.5	0.7	1.5	0	14	3	7.07143	0.762569	10.9083	0.95644	6.782	0.772001	3.7	4.7	2.97872	1.17609	0.214286	2.25	0.49	2.25	0	0.672098	0.39794	0.230449	0.39794	0	0.60206	0.136721	1.925	0.831358	2.23266	3.90689	2.56453	3.17723
University of Bristol - Biochem	2	4	1.5	1	41	27	4.12195	0.500648	11.2638	0.746317	5.88059	0.7151	8.5	9.5	4.31579	1.62325	0.658537	4	16	2.25	1	0.977724	0.477121	0.69897	0.39794	0.30103	1.44716	0.267172	3.125	0.769421	3.24793	5.39232	2.37551	2.47921
University of Bristol - Biochem	1.65	1	1	0	24	19	4.54167	0.53946	5.75	0.702876	5.92779	0.652312	3.65	4.65	5.16129	1.39794	0.791667	2.7225	1	1	0	0.667453	0.423246	0.30103	0.30103	0	1.30103	0.135133	1.9125	0.772893	2.21723	4.64386	2.16693	2.33491
University of Bristol - Biochem	4.5	7	0	1	27	18	6.2963	0.711936	7.77346	0.721415	5.86781	0.691416	12.5	13.5	2	1.44716	0.666667	20.25	49	0	1	1.13033	0.740363	0.90309	0	0.30103	1.27875	0.352183	4.125	0.768476	3.75489	4.80736	2.29683	2.39649
University of Bristol - Biochem	3	2	0	0	13	11	4.07692	0.529909	3.1859	0.528426	4.52	0.631174	5	6	2.16667	1.14613	0.846154	9	4	0	0	0.778151	0.60206	0.477121	0	0	1.07918	0.176091	2.25	0.655138	2.58496	3.80736	2.09672	1.75539
University of Bristol - Biochem	9	5	1	0	40	28	4.875	0.616589	6.49542	0.683502	5.68935	0.664098	15	16	2.5	1.61278	0.7	81	25	1	0	1.20412	1	0.778151	0.30103	0	1.4624	0.39794	4.75	0.755063	4	5.35756	2.20609	2.27055
University of Bristol - Biochem	3.5	3.6	1	0	17	4	8.35294	0.874653	5.49118	0.659606	6.90062	0.771792	8.1	9.1	1.86813	1.25527	0.235294	12.25	12.96	1	0	0.959041	0.653213	0.662758	0.30103	0	0.69897	0.257679	3.025	0.838888	3.18587	4.16993	2.56384	2.19117
University of Bristol - Biochem	2	5	1	0	16	10	4.6875	0.611994	4.18438	0.594676	6.6495	0.780726	8	9	1.77778	1.23045	0.625	4	25	1	0	0.954243	0.477121	0.778151	0.30103	0	1.04139	0.255273	3	0.822789	3.16993	4.08747	2.59352	1.97547
University of Bristol	4	3	0	0	20	16	3	0.380888	4.17167	0.618498	4.48335	0.611521	7	8	2.5	1.32222	0.8	16	9	0	0	0.90309	0.69897	0.60206	0	0	1.23045	0.230449	2.75	0.651603	3	4.39232	2.03143	2.05461
University of Bristol	1	1	0	0	9	3	9	0.770141	16.9352	1.08661	12.2853	0.986864	2	3	3	1	0.333333	1	1	0	0	0.477121	0.30103	0.30103	0	0	0.60206	0.0791812	1.5	1.08939	1.58496	3.32193	3.27829	3.60966
University of Bristol	3	1	0	0	14	8	4.57143	0.640964	3.94286	0.580309	4.951	0.438478	4	5	2.8	1.17609	0.571429	9	1	0	0	0.69897	0.60206	0.30103	0	0	0.954243	0.146128	2	0.694693	2.32193	3.90689	1.45659	1.92775
University of Bristol	4.6	0	0.5	0.5	7	6	7.71429	0.837256	4.93571	0.626546	3.18733	0.367187	5.6	6.6	1.06061	0.90309	0.857143	21.16	0	0.25	0.25	0.819544	0.748188	0	0.176091	0.176091	0.845098	0.193125	2.4	0.503427	2.72247	3	1.21977	2.08134
University of Bristol	3	0	0	0	28	19	5.89286	0.712684	5.62798	0.671314	3.83552	0.500594	3	4	7	1.4624	0.678571	9	0	0	0	0.60206	0.60206	0	0	0	1.30103	0.113943	1.75	0.583824	2	4.85798	1.66294	2.23006
University of Bristol	2	0	0.2	0	19	12	4.52632	0.573922	4.12018	0.504694	5.43294	0.61663	2.2	3.2	5.9375	1.30103	0.631579	4	0	0.04	0	0.50515	0.477121	0	0.0791812	0	1.11394	0.0863598	1.55	0.735035	1.67807	4.32193	2.0484	1.67656
University of Bristol	7.5	0.67	0	0	26	4	4.73077	0.650856	13.0628	0.789064	4.23192	0.553354	8.17	9.17	2.83533	1.43136	0.153846	56.25	0.4489	0	0	0.962369	0.929419	0.222716	0	0	0.69897	0.259355	3.0425	0.626538	3.19692	4.75489	1.8382	2.62121
University of Bristol	3	5	1	0	21	12	8.85714	0.847738	13.2762	0.888	6.81429	0.740485	9	10	2.1	1.34242	0.571429	9	25	1	0	1	0.60206	0.778151	0.30103	0	1.11394	0.278754	3.25	0.83342	3.32193	4.45943	2.45984	2.94987
University of Bristol	2	2	1	0	24	14	4.58333	0.603758	3.29514	0.54501	4.39687	0.580101	5	6	4	1.39794	0.583333	4	4	1	0	0.778151	0.477121	0.477121	0.30103	0	1.17609	0.176091	2.25	0.643144	2.58496	4.64386	1.92706	1.81048
University of Derby	6	0	0.5	1	4	1	9	0.894373	6	0.838135	2.62625	0.341038	7.5	8.5	0.470588	0.69897	0.25	36	0	0.25	1	0.929419	0.845098	0	0.176091	0.30103	0.30103	0.243038	2.875	0.419336	3.08746	2.32193	1.1329	2.78423
University of Durham	1	1	0	1	11	1	6.27273	0.759428	5.84697	0.631122	3.91045	0.553099	3	4	2.75	1.07918	0.0909091	1	1	0	1	0.60206	0.30103	0.30103	0	0.30103	0.30103	0.113943	1.75	0.592227	2	3.58496	1.83736	2.09654
University of East Anglia	3	3	1	0	32	17	5.90625	0.72734	5.9401	0.71855	6.56163	0.667386	7	8	4	1.51851	0.53125	9	9	1	0	0.90309	0.60206	0.60206	0.30103	0	1.25527	0.230449	2.75	0.817011	3	5.0444	2.21701	2.38697
University of East Anglia	4	1	1	0	16	11	6.5	0.774483	10.7531	0.98473	5.85163	0.702381	6	7	2.28571	1.23045	0.6875	16	1	1	0	0.845098	0.69897	0.30103	0.30103	0	1.07918	0.20412	2.5	0.767276	2.80736	4.08747	2.33326	3.2712
University of East Anglia	1	1	0	1	49	27	7.55102	0.791176	6.98673	0.704724	4.84618	0.611406	3	4	12.25	1.69897	0.55102	1	1	0	1	0.60206	0.30103	0.30103	0	0.30103	1.44716	0.113943	1.75	0.6854	2	5.64386	2.03105	2.34104
University of East Anglia	4	3	0	0	44	18	15.8636	0.851591	21.1326	0.922322	7.80359	0.727041	7	8	5.5	1.65321	0.409091	16	9	0	0	0.90309	0.69897	0.60206	0	0	1.27875	0.230449	2.75	0.892294	3	5.49186	2.41518	3.06389
University of East Anglia	2.5	1	1	0	10	8	4.1	0.486079	4.46	0.589728	4.441	0.601419	4.5	5.5	1.81818	1.04139	0.8	6.25	1	1	0	0.740363	0.544068	0.30103	0.30103	0	0.954243	0.161368	2.125	0.647481	2.45943	3.45943	1.99787	1.95903
University of East Anglia	3.5	3	0.5	0	2	2	3.5	0.539591	55.6	1.74105	7.2635	0.817123	7	8	0.25	0.477121	1	12.25	9	0.25	0	0.90309	0.653213	0.60206	0.176091	0	0.477121	0.230449	2.75	0.861146	3	1.58496	2.71442	5.78364
University of Edinburgh	3	0	0	0	5	4	4	0.47005	2.83333	0.470437	3.32225	0.454789	3	4	1.25	0.778151	0.8	9	0	0	0	0.60206	0.60206	0	0	0	0.69897	0.113943	1.75	0.521432	2	2.58496	1.51078	1.56276
University of Edinburgh	6	1	0	0	7	4	4.28571	0.562359	3.6	0.627987	3.944	0.553242	7	8	0.875	0.90309	0.571429	36	1	0	0	0.90309	0.845098	0.30103	0	0	0.69897	0.230449	2.75	0.595937	3	3	1.83783	2.08613
University of Edinburgh	1	2	2	0	18	8	4.33333	0.616574	7.08611	0.76425	5.09833	0.628185	5	6	3	1.27875	0.444444	1	4	4	0	0.778151	0.30103	0.477121	0.477121	0	0.954243	0.176091	2.25	0.707428	2.58496	4.24793	2.08679	2.53879
University of Edinburgh	2.5	1	1.5	1	13	4	9.23077	0.924584	4.66154	0.600065	3.47638	0.518532	6	7	1.85714	1.14613	0.307692	6.25	1	2.25	1	0.845098	0.544068	0.30103	0.39794	0.30103	0.69897	0.20412	2.5	0.541128	2.80736	3.80736	1.72253	1.99337
University of Edinburgh	3	1	0	0	17	7	11.7059	0.647315	8.31471	0.862863	10.5041	0.860393	4	5	3.4	1.25527	0.411765	9	1	0	0	0.69897	0.60206	0.30103	0	0	0.90309	0.146128	2	1.02136	2.32193	4.16993	2.85817	2.86637
University of Edinburgh	3.5	1	1	0	2	0	9	0.826606	42	0.964709	17.08	1.18972	5.5	6.5	0.307692	0.477121	0	12.25	1	1	0	0.812913	0.653213	0.30103	0.30103	0	0	0.190332	2.375	1.23249	2.70044	1.58496	3.95215	3.2047
University of Edinburgh	2	1.5	1	0	8	8	1.625	0.188144	6.18125	0.786583	5.97037	0.695872	4.5	5.5	1.45455	0.954243	1	4	2.25	1	0	0.740363	0.477121	0.39794	0.30103	0	0.954243	0.161368	2.125	0.776002	2.45943	3.16993	2.31164	2.61297
University of Edinburgh	3.5	3	1	0	16	10	187.812	0.929112	7.05729	0.758573	6.41463	0.697491	7.5	8.5	1.88235	1.23045	0.625	12.25	9	1	0	0.929419	0.653213	0.60206	0.30103	0	1.04139	0.243038	2.875	0.807171	3.08746	4.08747	2.31702	2.51993
University of Edinburgh	3	1	0.8	0	7	3	10.2857	0.922881	7.25952	0.676837	6.88386	0.827218	4.8	5.8	1.2069	0.90309	0.428571	9	1	0.64	0	0.763428	0.60206	0.30103	0.255273	0	0.60206	0.170262	2.2	0.837832	2.53605	3	2.74796	2.24841
University of Edinburgh	2	4	1.8	0	35	21	7.94286	0.810936	15.8895	0.944581	10.5757	0.866853	7.8	8.8	3.97727	1.5563	0.6	4	16	3.24	0	0.944483	0.477121	0.69897	0.447158	0	1.34242	0.25042	2.95	1.02431	3.13751	5.16993	2.87963	3.13783
University of Edinburgh	7	7	1	0	45	25	8.51111	0.871095	9.81963	0.794633	9.45016	0.824848	15	16	2.8125	1.66276	0.555556	49	49	1	0	1.20412	0.90309	0.90309	0.30103	0	1.41497	0.39794	4.75	0.975439	4	5.52357	2.74009	2.63971
University of Edinburgh	2	2	0	1	24	16	6.54167	0.723056	6.46042	0.4852	6.01408	0.691074	5	6	4	1.39794	0.666667	4	4	0	1	0.778151	0.477121	0.477121	0	0.30103	1.23045	0.176091	2.25	0.779169	2.58496	4.64386	2.2957	1.6118
University of Edinburgh	1	7	1	3	38	7	9.05263	0.896846	18.7689	1.04327	11.9475	0.940378	12	13	2.92308	1.59106	0.184211	1	49	1	9	1.11394	0.30103	0.90309	0.30103	0.60206	0.90309	0.342423	4	1.07728	3.70044	5.28541	3.12387	3.46568
University of Edinburgh	4	4	0	0	50	20	9.6	0.799509	15.933	0.94983	7.7789	0.718811	8	9	5.55556	1.70757	0.4	16	16	0	0	0.954243	0.69897	0.69897	0	0	1.32222	0.255273	3	0.890918	3.16993	5.67243	2.38784	3.15527
University of Edinburgh	1	0	1	0	1	1	2	0.30103	10.75	1.07004	20.761	1.31725	2	3	0.333333	0.30103	1	1	0	1	0	0.477121	0.30103	0	0.30103	0	0.30103	0.0791812	1.5	1.31725	1.58496	1	4.37581	3.55459
University of Exeter	4	2	0	0	7	4	22	0.645276	7.02381	0.744902	9.90717	0.772086	6	7	1	0.90309	0.571429	16	4	0	0	0.845098	0.69897	0.477121	0	0	0.69897	0.20412	2.5	0.995949	2.80736	3	2.56482	2.47451
University of Exeter	1	2.5	0.25	0	37	7	8.48649	0.882463	6.34955	0.76183	3.0853	0.393985	3.75	4.75	7.78947	1.57978	0.189189	1	6.25	0.0625	0	0.676694	0.30103	0.544068	0.09691	0	0.90309	0.138303	1.9375	0.489297	2.24793	5.24793	1.30879	2.53075
University of Exeter	2	0	0.5	0	3	3	4.33333	0.514689	3.83333	0.551071	5.36733	0.697215	2.5	3.5	0.857143	0.60206	1	4	0	0.25	0	0.544068	0.477121	0	0.176091	0	0.60206	0.09691	1.625	0.729759	1.80736	2	2.3161	1.83062
University of Exeter	5	1.5	0.2	0	35	22	5.82857	0.644667	4.06048	0.572145	3.5236	0.44722	6.7	7.7	4.54545	1.5563	0.628571	25	2.25	0.04	0	0.886491	0.778151	0.39794	0.0791812	0	1.36173	0.222716	2.675	0.546987	2.94486	5.16993	1.48563	1.90062
University of Exeter	2.6	2	2	0	15	11	4.2	0.597996	5.09556	0.684488	3.90487	0.564175	6.6	7.6	1.97368	1.20412	0.733333	6.76	4	4	0	0.880814	0.556303	0.477121	0.477121	0	1.07918	0.220108	2.65	0.591606	2.926	4	1.87415	2.27382
University of Exeter	2.5	2	0.125	0	19	12	10.7895	0.607162	10.8816	0.867069	7.17978	0.653539	4.625	5.625	3.37778	1.30103	0.631579	6.25	4	0.015625	0	0.750123	0.544068	0.477121	0.0511525	0	1.11394	0.165096	2.15625	0.856111	2.49185	4.32193	2.17101	2.88034
University of Exeter	2	1	0.5	0	5	2	17.2	0.763513	14.8333	0.981528	11.3074	0.779624	3.5	4.5	1.11111	0.778151	0.4	4	1	0.25	0	0.653213	0.477121	0.30103	0.176091	0	0.477121	0.130334	1.875	1.05336	2.16993	2.58496	2.58985	3.26057
University of Exeter	2	1.5	1.5	0	33	25	8.12121	0.618295	4.91364	0.572378	4.91734	0.566107	5	6	5.5	1.53148	0.757576	4	2.25	2.25	0	0.778151	0.477121	0.39794	0.39794	0	1.41497	0.176091	2.25	0.691731	2.58496	5.08747	1.88057	1.9014
University of Exeter	13	8	0	0	64	38	7.85938	0.85934	5.85	0.725506	2.81402	0.370036	21	22	3.05	1.81291	0.59375	169	64	0	0	1.34242	1.14613	0.954243	0	0	1.59106	0.491362	6.25	0.449327	4.45943	6.02237	1.22923	2.41008
University of Exeter	10	1	0	0	50	35	3.96	0.536586	4.35767	0.607217	6.71252	0.647434	11	12	4.16667	1.70757	0.7	100	1	0	0	1.07918	1.04139	0.30103	0	0	1.5563	0.322219	3.75	0.826886	3.58496	5.67243	2.15073	2.01713
University of Exeter	3	1	1	0	37	28	3.97297	0.560387	4	0.621812	4.57268	0.556368	5	6	6.16667	1.57978	0.756757	9	1	1	0	0.778151	0.60206	0.30103	0.30103	0	1.4624	0.176091	2.25	0.66017	2.58496	5.24793	1.84822	2.06562
University of Exeter	3	1.5	0	0	49	25	4.55102	0.623989	5.0585	0.636902	5.80059	0.596842	4.5	5.5	8.90909	1.69897	0.510204	9	2.25	0	0	0.740363	0.60206	0.39794	0	0	1.41497	0.161368	2.125	0.763472	2.45943	5.64386	1.98267	2.11574
University of Hull	4	0	0.2	0	24	13	5.125	0.675283	2.20208	0.45241	2.34283	0.315227	4.2	5.2	4.61538	1.39794	0.541667	16	0	0.04	0	0.716003	0.69897	0	0.0791812	0	1.14613	0.152288	2.05	0.369741	2.37851	4.64386	1.04716	1.50287
University of Kent	4	1	0	0	10	8	3.9	0.502465	3.78333	0.596261	5.7433	0.710496	5	6	1.66667	1.04139	0.8	16	1	0	0	0.778151	0.69897	0.30103	0	0	0.954243	0.176091	2.25	0.759162	2.58496	3.45943	2.36022	1.98074
University of Kent	7	1	0	0	49	36	10.6735	0.80137	6.9585	0.464462	5.02239	0.553331	8	9	5.44444	1.69897	0.734694	49	1	0	0	0.954243	0.90309	0.30103	0	0	1.5682	0.255273	3	0.70091	3.16993	5.64386	1.83813	1.54291
University of Kent	1.5	4	1	0	37	16	4.91892	0.64306	2.55631	0.433575	4.20531	0.577104	6.5	7.5	4.93333	1.57978	0.432432	2.25	16	1	0	0.875061	0.39794	0.69897	0.30103	0	1.23045	0.217484	2.625	0.623798	2.90689	5.24793	1.9171	1.44031
University of Kent	5	2	1	0	14	9	4	0.567141	4.37857	0.647275	10.2859	0.783854	8	9	1.55556	1.17609	0.642857	25	4	1	0	0.954243	0.778151	0.477121	0.30103	0	1	0.255273	3	1.01224	3.16993	3.90689	2.60391	2.1502
University of Leeds	3	2	0	0	10	3	6	0.727894	8.28667	0.826198	3.4611	0.458248	5	6	1.66667	1.04139	0.3	9	4	0	0	0.778151	0.60206	0.477121	0	0	0.60206	0.176091	2.25	0.539214	2.58496	3.45943	1.52227	2.74457
University of Leeds	2.5	0	0	0	34	14	3.79412	0.566892	2.82696	0.48682	2.27085	0.193448	2.5	3.5	9.71429	1.54407	0.411765	6.25	0	0	0	0.544068	0.544068	0	0	0	1.17609	0.09691	1.625	0.356189	1.80736	5.12929	0.64262	1.61718
University of Leeds	3.5	1	0	0	10	8	4	0.545939	2.83833	0.53034	3.4129	0.447447	4.5	5.5	1.81818	1.04139	0.8	12.25	1	0	0	0.740363	0.653213	0.30103	0	0	0.954243	0.161368	2.125	0.533124	2.45943	3.45943	1.48639	1.76175
University of Leeds	0	4	1	0	38	17	7.71053	0.788894	7.63289	0.808504	5.60497	0.713625	5	6	6.33333	1.59106	0.447368	0	16	1	0	0.778151	0	0.69897	0.30103	0	1.25527	0.176091	2.25	0.748573	2.58496	5.28541	2.37061	2.68579
University of Leeds	6	5	2.3	0	17	11	4.11765	0.570612	8.03824	0.658427	6.75919	0.696212	13.3	14.3	1.18881	1.25527	0.647059	36	25	5.29	0	1.15534	0.845098	0.778151	0.518514	0	1.07918	0.367356	4.325	0.829894	3.83795	4.16993	2.31277	2.18725
University of Leeds	10	8	4	0	58	22	5.37931	0.708282	2.25891	0.349146	3.20723	0.46877	22	23	2.52174	1.77085	0.37931	100	64	16	0	1.36173	1.04139	0.954243	0.69897	0	1.36173	0.50515	6.5	0.50613	4.52356	5.88265	1.55722	1.15984
University of Leeds	2	2	0	0	19	12	6.31579	0.743445	3.09298	0.487626	4.9285	0.660158	4	5	3.8	1.30103	0.631579	4	4	0	0	0.69897	0.477121	0.477121	0	0	1.11394	0.146128	2	0.692715	2.32193	4.32193	2.193	1.61986
University of Leeds	4	5	2	0	22	12	6.68182	0.777518	3.88788	0.448723	3.71324	0.490943	11	12	1.83333	1.36173	0.545455	16	25	4	0	1.07918	0.69897	0.778151	0.477121	0	1.11394	0.322219	3.75	0.569753	3.58496	4.52356	1.63088	1.49063
University of Leeds	2	4	1	2	35	21	5.08571	0.615007	9.68952	0.802496	7.98406	0.731613	9	10	3.5	1.5563	0.6	4	16	1	4	1	0.477121	0.69897	0.30103	0.477121	1.34242	0.278754	3.25	0.902224	3.32193	5.16993	2.43037	2.66583
University of Leicester	4	0	0	3	25	13	5	0.654425	3.19533	0.512087	1.99305	0.217414	7	8	3.125	1.41497	0.52	16	0	0	9	0.90309	0.69897	0	0	0.60206	1.14613	0.230449	2.75	0.299517	3	4.70044	0.722233	1.70112
University of Leicester	3	0	0.5	0	5	5	4.6	0.65666	2.98	0.536063	2.8782	0.413797	3.5	4.5	1.11111	0.778151	1	9	0	0.25	0	0.653213	0.60206	0	0.176091	0	0.778151	0.130334	1.875	0.459121	2.16993	2.58496	1.3746	1.78076
University of Leicester	3	1	0.5	0	14	11	4.21429	0.56493	8.24286	0.82903	3.38657	0.481442	4.5	5.5	2.54545	1.17609	0.785714	9	1	0.25	0	0.740363	0.60206	0.30103	0.176091	0	1.07918	0.161368	2.125	0.52976	2.45943	3.90689	1.59932	2.75398
University of Leicester	2.5	0.5	0	2	3	2	10	0.998545	3.77778	0.507626	3.94	0.578716	5	6	0.5	0.60206	0.666667	6.25	0.25	0	4	0.778151	0.544068	0.176091	0	0.477121	0.477121	0.176091	2.25	0.595496	2.58496	2	1.92245	1.6863
University of Leicester	2	1	1	0	8	3	8.375	0.848134	16.8542	0.842183	8.13738	0.594524	4	5	1.6	0.954243	0.375	4	1	1	0	0.69897	0.477121	0.30103	0.30103	0	0.60206	0.146128	2	0.910484	2.32193	3.16993	1.97497	2.79767
University of Leicester	1.5	2	0.7	0.5	9	7	3.88889	0.46331	2.0537	0.397855	4.60078	0.62826	4.7	5.7	1.57895	1	0.777778	2.25	4	0.49	0.25	0.755875	0.39794	0.477121	0.230449	0.176091	0.90309	0.167317	2.175	0.662831	2.51096	3.32193	2.08704	1.32165
University of Liverpool	1	2	0	0	8	5	3.375	0.511185	2.60625	0.465749	2.5885	0.347404	3	4	2	0.954243	0.625	1	4	0	0	0.60206	0.30103	0.477121	0	0	0.778151	0.113943	1.75	0.413048	2	3.16993	1.15405	1.54718
University of Liverpool	2	1	2	4	1	0	6	0.778151	1.66667	0.425969	3.637	0.560743	9	10	0.1	0.30103	0	4	1	4	16	1	0.477121	0.30103	0.477121	0.69897	0	0.278754	3.25	0.560743	3.32193	1	1.86275	1.41504
University of Liverpool	5	5.5	0.5	1	4	0	6.75	0.820825	10.7292	0.845854	10.3575	0.655046	12	13	0.307692	0.69897	0	25	30.25	0.25	1	1.11394	0.778151	0.812913	0.176091	0.30103	0	0.342423	4	1.01525	3.70044	2.32193	2.17602	2.80987
University of Manchester	2	0.5	0	0	6	1	11	1.00412	2.63333	0.464883	4.92167	0.621861	2.5	3.5	1.71429	0.845098	0.166667	4	0.25	0	0	0.544068	0.477121	0.176091	0	0	0.30103	0.09691	1.625	0.692112	1.80736	2.80736	2.06578	1.54431
University of Manchester	0	2	0	0	4	3	5.5	0.725772	13.3	0.720403	4.66675	0.637628	2	3	1.33333	0.69897	0.75	0	4	0	0	0.477121	0	0.477121	0	0	0.60206	0.0791812	1.5	0.669015	1.58496	2.32193	2.11816	2.39313
University of Manchester	4	1	0	0	20	4	6.15	0.732788	5.50417	0.614656	4.89765	0.629847	5	6	3.33333	1.32222	0.2	16	1	0	0	0.778151	0.69897	0.30103	0	0	0.69897	0.176091	2.25	0.689988	2.58496	4.39232	2.09231	2.04185
University of Manchester	5	2	0	0	13	9	102.538	0.753953	42.2051	0.930604	7.50715	0.760208	7	8	1.625	1.14613	0.692308	25	4	0	0	0.90309	0.778151	0.477121	0	0	1	0.230449	2.75	0.875475	3	3.80736	2.52536	3.0914
University of Manchester	5	1	0	0	17	13	4.11765	0.546484	12.3127	0.847097	4.6086	0.641482	6	7	2.42857	1.25527	0.764706	25	1	0	0	0.845098	0.778151	0.30103	0	0	1.14613	0.20412	2.5	0.663569	2.80736	4.16993	2.13096	2.814
University of Manchester	5	1	0	0	9	6	7	0.64194	2.61667	0.503437	5.52844	0.724847	6	7	1.28571	1	0.666667	25	1	0	0	0.845098	0.778151	0.30103	0	0	0.845098	0.20412	2.5	0.742603	2.80736	3.32193	2.40789	1.67238
University of Manchester	4	0	0	0	11	4	4.27273	0.614898	1.46667	0.344565	3.59827	0.524926	4	5	2.2	1.07918	0.363636	16	0	0	0	0.69897	0.69897	0	0	0	0.69897	0.146128	2	0.556094	2.32193	3.58496	1.74377	1.14462
University of Manchester	6.2	6	1.6	0	44	27	6.09091	0.746193	6.3072	0.614664	5.94409	0.689241	13.8	14.8	2.97297	1.65321	0.613636	38.44	36	2.56	0	1.17026	0.857332	0.845098	0.414973	0	1.44716	0.376577	4.45	0.774085	3.88753	5.49186	2.28961	2.04187
University of Manchester	5	5	1	0	21	13	4.71429	0.644015	4.5881	0.630521	5.59105	0.715458	11	12	1.75	1.34242	0.619048	25	25	1	0	1.07918	0.778151	0.778151	0.30103	0	1.14613	0.322219	3.75	0.747493	3.58496	4.45943	2.3767	2.09455
University of Manchester	3	0	0	0	2	1	4.5	0.627636	3.4	0.639377	6.58	0.817686	3	4	0.5	0.477121	0.5	9	0	0	0	0.60206	0.60206	0	0	0	0.30103	0.113943	1.75	0.818226	2	1.58496	2.71629	2.12396
University of Manchester	12	13	2	3	55	37	5.69091	0.708564	3.43848	0.564129	4.16938	0.599938	30	31	1.77419	1.74819	0.672727	144	169	4	9	1.49136	1.11394	1.14613	0.477121	0.60206	1.57978	0.60206	8.5	0.620072	4.9542	5.80736	1.99295	1.874
University of Manchester	3	0	0	0	10	4	7.2	0.806037	13.12	0.923515	5.4386	0.693154	3	4	2.5	1.04139	0.4	9	0	0	0	0.60206	0.60206	0	0	0	0.69897	0.113943	1.75	0.735487	2	3.45943	2.30261	3.06785
University of Manchester	2	0	0	0	17	15	3.52941	0.525558	4.74706	0.589484	5.09918	0.641847	2	3	5.66667	1.25527	0.882353	4	0	0	0	0.477121	0.477121	0	0	0	1.20412	0.0791812	1.5	0.7075	1.58496	4.16993	2.13217	1.95822
University of Manchester	4	2.5	0	0	20	10	7.85	0.734823	55.505	1.16741	7.95585	0.815692	6.5	7.5	2.66667	1.32222	0.5	16	6.25	0	0	0.875061	0.69897	0.544068	0	0	1.04139	0.217484	2.625	0.900687	2.90689	4.39232	2.70967	3.87806
University of Manchester	4	2	1.5	0	24	15	11.3333	0.804478	4.44722	0.449472	5.6487	0.554575	7.5	8.5	2.82353	1.39794	0.625	16	4	2.25	0	0.929419	0.69897	0.477121	0.39794	0	1.20412	0.243038	2.875	0.751948	3.08746	4.64386	1.84226	1.49311
University of Manchester	3	2	0	0	22	5	16.9545	1.0966	22.2652	0.863198	5.60905	0.721853	5	6	3.66667	1.36173	0.227273	9	4	0	0	0.778151	0.60206	0.477121	0	0	0.778151	0.176091	2.25	0.748889	2.58496	4.52356	2.39795	2.86748
University of Newcastle Upon Tyne	8	2	1	0	23	15	6.73913	0.776628	3.74565	0.562575	2.87077	0.429141	11	12	1.91667	1.38021	0.652174	64	4	1	0	1.07918	0.954243	0.477121	0.30103	0	1.20412	0.322219	3.75	0.457999	3.58496	4.58497	1.42557	1.86884
University of Nottingham	1	1	0.3	0	11	10	1.90909	0.205025	1.55909	0.321935	5.25791	0.632522	2.3	3.3	3.33333	1.07918	0.909091	1	1	0.09	0	0.518514	0.30103	0.30103	0.113943	0	1.04139	0.0899051	1.575	0.720813	1.72247	3.58496	2.10119	1.06944
University of Nottingham	2.33	1	0.2	0	10	9	3.5	0.501569	2.435	0.464158	4.2886	0.529838	3.53	4.53	2.20751	1.04139	0.9	5.4289	1	0.04	0	0.656098	0.522444	0.30103	0.0791812	0	1	0.131298	1.8825	0.632316	2.17951	3.45943	1.76008	1.5419
University of Nottingham	3	3	1.4	0	5	0	13.6	1.02676	3.68	0.400692	6.752	0.786262	7.4	8.4	0.595238	0.778151	0	9	9	1.96	0	0.924279	0.60206	0.60206	0.380211	0	0	0.240549	2.85	0.829432	3.07039	2.58496	2.61191	1.33107
University of Nottingham	5	0.6	1	0	23	11	7.91304	0.765723	11.3065	0.777369	9.07083	0.814482	6.6	7.6	3.02632	1.38021	0.478261	25	0.36	1	0	0.880814	0.778151	0.20412	0.30103	0	1.07918	0.220108	2.65	0.957647	2.926	4.58497	2.70565	2.58237
University of Nottingham	3	0	0.2	0	47	24	5.51064	0.662902	3.07872	0.495719	3.01754	0.428995	3.2	4.2	11.1905	1.68124	0.510638	9	0	0.04	0	0.623249	0.60206	0	0.0791812	0	1.39794	0.120574	1.8	0.479654	2.07039	5.58497	1.42509	1.64674
University of Nottingham	4	2	0.5	0	35	21	8.6	0.752346	7.40905	0.596041	10.4755	0.831809	6.5	7.5	4.66667	1.5563	0.6	16	4	0.25	0	0.875061	0.69897	0.477121	0.176091	0	1.34242	0.217484	2.625	1.02018	2.90689	5.16993	2.76321	1.98001
University of Nottingham	4	1	1	0	20	14	6.7	0.786931	4.44917	0.673625	3.98435	0.56692	6	7	2.85714	1.32222	0.7	16	1	1	0	0.845098	0.69897	0.30103	0.30103	0	1.17609	0.20412	2.5	0.600357	2.80736	4.39232	1.88327	2.23773
University of Nottingham	1	3	0.1	0	12	6	11.25	0.8578	5.57639	0.550292	5.28483	0.536774	4.1	5.1	2.35294	1.11394	0.5	1	9	0.01	0	0.70757	0.30103	0.60206	0.0413927	0	0.845098	0.149219	2.025	0.723031	2.3505	3.70044	1.78313	1.82803
University of Oxford - Biochem	2	2	0	0	9	6	6	0.759956	3.57778	0.622468	5.69089	0.719796	4	5	1.8	1	0.666667	4	4	0	0	0.69897	0.477121	0.477121	0	0	0.845098	0.146128	2	0.75518	2.32193	3.32193	2.39111	2.0678
University of Oxford - Biochem	3	1.5	0	0	18	8	6.44444	0.742923	3.84074	0.572958	3.99211	0.523341	4.5	5.5	3.27273	1.27875	0.444444	9	2.25	0	0	0.740363	0.60206	0.39794	0	0	0.954243	0.161368	2.125	0.601203	2.45943	4.24793	1.7385	1.90333
University of Oxford - Biochem	1	6	1	0	33	15	4.72727	0.64681	7.34646	0.686583	9.25791	0.832353	8	9	3.66667	1.53148	0.454545	1	36	1	0	0.954243	0.30103	0.845098	0.30103	0	1.20412	0.255273	3	0.966513	3.16993	5.08747	2.76502	2.28078
University of Oxford - Biochem	2	1	1	0	12	4	5.75	0.651838	6.60139	0.715013	8.07375	0.833973	4	5	2.4	1.11394	0.333333	4	1	1	0	0.69897	0.477121	0.30103	0.30103	0	0.69897	0.146128	2	0.907075	2.32193	3.70044	2.7704	2.37522
University of Oxford - Biochem	0	3	1	0	14	7	7	0.656899	6.15714	0.467591	7.66407	0.740858	4	5	2.8	1.17609	0.5	0	9	1	0	0.69897	0	0.60206	0.30103	0	0.90309	0.146128	2	0.88446	2.32193	3.90689	2.46108	1.55331
University of Oxford - Biochem	14	9	0	0	107	76	4.88785	0.614283	5.56511	0.582054	5.39224	0.646545	23	24	4.45833	2.03342	0.71028	196	81	0	0	1.38021	1.17609	1	0	0	1.88649	0.518514	6.75	0.731769	4.58497	6.75489	2.14778	1.93354
University of Oxford - Plant	1	3	0	0	22	16	4.40909	0.541114	5.93864	0.696597	5.04977	0.652494	4	5	4.4	1.36173	0.727273	1	9	0	0	0.69897	0.30103	0.60206	0	0	1.23045	0.146128	2	0.703272	2.32193	4.52356	2.16754	2.31405
University of Oxford - Plant	2	6	1	2	15	13	3.13333	0.446462	8.46667	0.807538	6.7278	0.786356	11	12	1.25	1.20412	0.866667	4	36	1	4	1.07918	0.477121	0.845098	0.30103	0.477121	1.14613	0.322219	3.75	0.827873	3.58496	4	2.61222	2.68258
University of Oxford - Plant	6	4	0	2	25	12	5.88	0.696615	13.4233	1.0208	6.41792	0.76718	12	13	1.92308	1.41497	0.48	36	16	0	4	1.11394	0.845098	0.69897	0	0.477121	1.11394	0.342423	4	0.807394	3.70044	4.70044	2.54852	3.39104
University of Oxford - Zoology	2	1	0	0	11	5	5.45455	0.714618	11.3894	1.02445	14.4929	0.950272	3	4	2.75	1.07918	0.454545	4	1	0	0	0.60206	0.477121	0.30103	0	0	0.778151	0.113943	1.75	1.16116	2	3.58496	3.15674	3.40314
University of Plymouth	1	1	0	0	5	2	5.8	0.707941	11.8333	0.771319	4.8878	0.541764	2	3	1.66667	0.778151	0.4	1	1	0	0	0.477121	0.30103	0.30103	0	0	0.477121	0.0791812	1.5	0.689113	1.58496	2.58496	1.7997	2.56227
University of Plymouth	2	0	0	0	8	3	4.875	0.661087	5.00208	0.690115	3.17937	0.438169	2	3	2.66667	0.954243	0.375	4	0	0	0	0.477121	0.477121	0	0	0	0.60206	0.0791812	1.5	0.502342	1.58496	3.16993	1.45557	2.29251
University of Plymouth	5	1.2	0.2	0	30	11	5.46667	0.661255	6.565	0.646772	3.29137	0.41945	6.4	7.4	4.05405	1.49136	0.366667	25	1.44	0.04	0	0.869232	0.778151	0.342423	0.0791812	0	1.07918	0.214844	2.6	0.517376	2.88753	4.9542	1.39339	2.14853
University of Reading	2	0	0.5	0	7	3	9.85714	0.955326	9.82619	0.748768	7.60829	0.758911	2.5	3.5	2	0.90309	0.428571	4	0	0.25	0	0.544068	0.477121	0	0.176091	0	0.60206	0.09691	1.625	0.881287	1.80736	3	2.52105	2.48736
University of Reading	0	1	0	0	5	4	3.2	0.466891	2.28	0.498804	3.22625	0.474165	1	2	2.5	0.778151	0.8	0	1	0	0	0.30103	0	0.30103	0	0	0.69897	0.0413927	1.25	0.508698	1	2.58496	1.57514	1.65699
University of Reading	3.5	0	0	0	21	16	5.33333	0.657724	4.28968	0.615939	3.9579	0.504917	3.5	4.5	4.66667	1.34242	0.761905	12.25	0	0	0	0.653213	0.653213	0	0	0	1.23045	0.130334	1.875	0.597465	2.16993	4.45943	1.6773	2.04611
University of Reading	4.33	0.5	0.1	0	14	3	8.71429	0.83844	9.08333	0.868141	6.40207	0.753542	4.93	5.93	2.36088	1.17609	0.214286	18.7489	0.25	0.01	0	0.773055	0.726727	0.176091	0.0413927	0	0.60206	0.17406	2.2325	0.806321	2.56803	3.90689	2.50321	2.8839
University of Reading	2.75	0.33	0.1	0	23	15	5.65217	0.663771	4.87029	0.654569	4.50152	0.554864	3.18	4.18	5.50239	1.38021	0.652174	7.5625	0.1089	0.01	0	0.621176	0.574031	0.123852	0.0413927	0	1.20412	0.119915	1.795	0.653359	2.0635	4.58497	1.84322	2.17443
University of Reading	3	7	2	0	32	25	6.71875	0.757747	4.09375	0.551296	5.89677	0.731378	12	13	2.46154	1.51851	0.78125	9	49	4	0	1.11394	0.60206	0.90309	0.477121	0	1.41497	0.342423	4	0.770614	3.70044	5.0444	2.42958	1.83137
University of Reading	4	1	0	0	27	13	6.22222	0.663508	6.02593	0.674124	5.63285	0.57741	5	6	4.5	1.44716	0.481481	16	1	0	0	0.778151	0.69897	0.30103	0	0	1.14613	0.176091	2.25	0.750728	2.58496	4.80736	1.91812	2.23939
University of Sheffield	0.35	0	0.25	0	3	0	7	0.836848	1.5	0.340396	3.036	0.333702	0.6	1.6	1.875	0.60206	0	0.1225	0	0.0625	0	0.20412	0.130334	0	0.09691	0	0	0.0253059	1.15	0.482302	0.678072	2	1.10854	1.13077
University of Sheffield	5	3	0	0	22	13	5.27273	0.700421	5.17348	0.622987	4.40864	0.578627	8	9	2.44444	1.36173	0.590909	25	9	0	0	0.954243	0.778151	0.60206	0	0	1.14613	0.255273	3	0.644304	3.16993	4.52356	1.92216	2.06952
University of Sheffield	7	0	0	0	10	3	3.9	0.568664	0.515	0.149831	1.088	0.00700371	7	8	1.25	1.04139	0.3	49	0	0	0	0.90309	0.90309	0	0	0	0.60206	0.230449	2.75	0.0366289	3	3.45943	0.0232658	0.497728
University of Sheffield	2.5	0	0	0	8	8	3.25	0.488561	4.03542	0.616444	2.71312	0.424993	2.5	3.5	2.28571	0.954243	1	6.25	0	0	0	0.544068	0.544068	0	0	0	0.954243	0.09691	1.625	0.43347	1.80736	3.16993	1.4118	2.04778
University of Sheffield	3	1	1	0	15	10	5.26667	0.615463	6.37222	0.714927	5.42046	0.680254	5	6	2.5	1.20412	0.666667	9	1	1	0	0.778151	0.60206	0.30103	0.30103	0	1.04139	0.176091	2.25	0.734036	2.58496	4	2.25976	2.37494
University of Sheffield	5	4	1	0	23	13	7.30435	0.823504	6.37754	0.753586	4.75352	0.632913	10	11	2.09091	1.38021	0.565217	25	16	1	0	1.04139	0.778151	0.69897	0.30103	0	1.14613	0.30103	3.5	0.677015	3.45943	4.58497	2.10249	2.50336
University of Sheffield	5	2	0.5	0	13	6	4.76923	0.627158	8.65641	0.817087	6.84923	0.789408	7.5	8.5	1.52941	1.14613	0.461538	25	4	0.25	0	0.929419	0.778151	0.477121	0.176091	0	0.845098	0.243038	2.875	0.835642	3.08746	3.80736	2.62236	2.71431
University of Sheffield	4	2.5	0	0	10	4	7.4	0.834152	3.83	0.598044	4.798	0.654803	6.5	7.5	1.33333	1.04139	0.4	16	6.25	0	0	0.875061	0.69897	0.544068	0	0	0.69897	0.217484	2.625	0.68106	2.90689	3.45943	2.17521	1.98666
University of Sheffield	4	2	2	0	31	25	8.64516	0.638511	5.75699	0.701301	5.27126	0.61048	8	9	3.44444	1.50515	0.806452	16	4	4	0	0.954243	0.69897	0.477121	0.477121	0	1.41497	0.255273	3	0.721914	3.16993	5	2.02797	2.32967
University of Sheffield	2	3	1	1	42	26	7.04762	0.697831	9.71032	0.824114	7.62471	0.754604	7	8	5.25	1.63347	0.619048	4	9	1	1	0.90309	0.477121	0.60206	0.30103	0.30103	1.43136	0.230449	2.75	0.882224	3	5.42627	2.50674	2.73765
University of Sheffield	2.5	5.5	0	0	55	25	5.83636	0.676884	7.19848	0.755978	5.22249	0.647303	8	9	6.11111	1.74819	0.454545	6.25	30.25	0	0	0.954243	0.544068	0.812913	0	0	1.41497	0.255273	3	0.717878	3.16993	5.80736	2.1503	2.51131
University of Sheffield	4.67	6.5	2	0	81	29	7.92593	0.772424	5.97757	0.698812	5.31642	0.611765	13.17	14.17	5.7163	1.91381	0.358025	21.8089	42.25	4	0	1.15137	0.753583	0.875061	0.477121	0	1.47712	0.364926	4.2925	0.725619	3.82477	6.35756	2.03224	2.3214
University of Sussex	5	3	0	3	6	2	6	0.730934	3.98056	0.66548	5.71183	0.669345	11	12	0.5	0.845098	0.333333	25	9	0	9	1.07918	0.778151	0.60206	0	0.60206	0.477121	0.322219	3.75	0.756776	3.58496	2.80736	2.22352	2.21068
University of Sussex	2	4	0	1	37	17	7.59459	0.745672	9.73018	0.729015	8.66508	0.798116	7	8	4.625	1.57978	0.459459	4	16	0	1	0.90309	0.477121	0.69897	0	0.30103	1.25527	0.230449	2.75	0.937773	3	5.24793	2.65129	2.42174
University of Sussex	4	6	2	0	25	14	6.64	0.750828	7.70067	0.787931	11.5486	0.89628	12	13	1.92308	1.41497	0.56	16	36	4	0	1.11394	0.69897	0.845098	0.477121	0	1.17609	0.342423	4	1.06253	3.70044	4.70044	2.97738	2.61745
University of Sussex	2	3	0	0	8	3	6.75	0.800608	9.64583	0.86927	12.0642	0.968191	5	6	1.33333	0.954243	0.375	4	9	0	0	0.778151	0.477121	0.60206	0	0	0.60206	0.176091	2.25	1.0815	2.58496	3.16993	3.21626	2.88765
University of Sussex	2	6	0	0	23	19	5.13043	0.600699	8.82246	0.718857	10.4487	0.848447	8	9	2.55556	1.38021	0.826087	4	36	0	0	0.954243	0.477121	0.845098	0	0	1.30103	0.255273	3	1.01906	3.16993	4.58497	2.81848	2.38799
University of Sussex	1	10	1	2	45	11	10.4667	0.941652	10.0111	0.887693	7.75504	0.828735	14	15	3	1.66276	0.244444	1	100	1	4	1.17609	0.30103	1.04139	0.30103	0.477121	1.07918	0.380211	4.5	0.889584	3.90689	5.52357	2.753	2.94885
University of Sussex	2	1	1	0	4	2	5	0.539591	17.3958	1.09685	24.0305	1.32189	4	5	0.8	0.69897	0.5	4	1	1	0	0.69897	0.477121	0.30103	0.30103	0	0.477121	0.146128	2	1.38076	2.32193	2.32193	4.39124	3.64366
University of Sussex	1	0	0	0	4	1	7.5	0.765363	9	0.811378	3.32925	0.482116	1	2	2	0.69897	0.25	1	0	0	0	0.30103	0.30103	0	0	0	0.30103	0.0413927	1.25	0.522346	1	2.32193	1.60156	2.69534
University of Sussex	4	1	0.5	1	9	9	5.33333	0.720065	3.69815	0.593866	4.27722	0.596657	6.5	7.5	1.2	1	1	16	1	0.25	1	0.875061	0.69897	0.30103	0.176091	0.30103	1	0.217484	2.625	0.631162	2.90689	3.32193	1.98205	1.97278
University of Sussex	2	1	0	0	3	2	5.66667	0.74177	4.77778	0.759585	7.103	0.713763	3	4	0.75	0.60206	0.666667	4	1	0	0	0.60206	0.477121	0.30103	0	0	0.477121	0.113943	1.75	0.851442	2	2	2.37107	2.52329
University of Sussex	1	0	0	0	5	3	5.4	0.696116	1.08	0.310874	2.5788	0.350934	1	2	2.5	0.778151	0.6	1	0	0	0	0.30103	0.30103	0	0	0	0.60206	0.0413927	1.25	0.411418	1	2.58496	1.16578	1.0327
University of Sussex	1	2	0	1	9	5	3.22222	0.479636	8.66667	0.905224	5.92367	0.687646	4	5	1.8	1	0.555556	1	4	0	1	0.69897	0.30103	0.477121	0	0.30103	0.778151	0.146128	2	0.772591	2.32193	3.32193	2.28431	3.00709
University of Sussex	2	2	1	0	23	11	6.43478	0.764833	4.14348	0.555344	3.49655	0.509321	5	6	3.83333	1.38021	0.478261	4	4	1	0	0.778151	0.477121	0.477121	0.30103	0	1.07918	0.176091	2.25	0.543639	2.58496	4.58497	1.69193	1.84482
University of Sussex	5	1.6	1.6	6	39	34	4.4359	0.571403	6.38974	0.704174	6.40369	0.586718	14.2	15.2	2.56579	1.60206	0.871795	25	2.56	2.56	36	1.18184	0.778151	0.414973	0.414973	0.845098	1.54407	0.383815	4.55	0.80643	3.926	5.32193	1.94904	2.33922
University of Sussex	2	1	0	0	24	21	8.79167	0.540824	4.58194	0.578622	6.65161	0.620062	3	4	6	1.39794	0.875	4	1	0	0	0.60206	0.477121	0.30103	0	0	1.34242	0.113943	1.75	0.822927	2	4.64386	2.0598	1.92214
University of Sussex	2	1	0	0	21	8	7.47619	0.810106	10.446	0.851058	4.496	0.552807	3	4	5.25	1.34242	0.380952	4	1	0	0	0.60206	0.477121	0.30103	0	0	0.954243	0.113943	1.75	0.652826	2	4.45943	1.83639	2.82715
University of Sussex	2	0	0	0	6	4	2.33333	0.330379	2.44444	0.411821	3.24667	0.467664	2	3	2	0.845098	0.666667	4	0	0	0	0.477121	0.477121	0	0	0	0.69897	0.0791812	1.5	0.511438	1.58496	2.80736	1.55355	1.36804
University of Sussex	1.5	1.5	0	0	17	12	10.2353	0.439711	2.73627	0.490528	3.68529	0.485943	3	4	4.25	1.25527	0.705882	2.25	2.25	0	0	0.60206	0.39794	0.39794	0	0	1.11394	0.113943	1.75	0.566472	2	4.16993	1.61427	1.6295
University of York	2	1	0	0	4	3	3.25	0.376287	7.47917	0.871667	5.35025	0.700454	3	4	1	0.69897	0.75	4	1	0	0	0.60206	0.477121	0.30103	0	0	0.60206	0.113943	1.75	0.728374	2	2.32193	2.32686	2.89562
University of York	4	1	0.5	0	19	16	3.42105	0.470809	7.96228	0.753436	5.61047	0.699847	5.5	6.5	2.92308	1.30103	0.842105	16	1	0.25	0	0.812913	0.69897	0.30103	0.176091	0	1.23045	0.190332	2.375	0.749	2.70044	4.32193	2.32484	2.50286
University of York	3.5	0	0	0	11	6	5.54545	0.680989	3.83636	0.599272	4.26855	0.604071	3.5	4.5	2.44444	1.07918	0.545455	12.25	0	0	0	0.653213	0.653213	0	0	0	0.845098	0.130334	1.875	0.63028	2.16993	3.58496	2.00668	1.99074
University of York	3	5	0	0	31	12	7.09677	0.767817	4.19892	0.451788	6.30026	0.70356	8	9	3.44444	1.50515	0.387097	9	25	0	0	0.954243	0.60206	0.778151	0	0	1.11394	0.255273	3	0.799358	3.16993	5	2.33718	1.50081
University of York	1.5	0	0	0	16	13	3.6875	0.54522	5.34896	0.590153	4.34713	0.498821	1.5	2.5	6.4	1.23045	0.8125	2.25	0	0	0	0.39794	0.39794	0	0	0	1.14613	0.0606978	1.375	0.638202	1.32193	4.08747	1.65705	1.96045
University of York	2.5	0	0	0	9	4	4.33333	0.573151	14.5185	1.05771	5.19489	0.687528	2.5	3.5	2.57143	1	0.444444	6.25	0	0	0	0.544068	0.544068	0	0	0	0.69897	0.09691	1.625	0.715576	1.80736	3.32193	2.28392	3.51365
University of York	1	1	1	6	27	16	8.96296	0.864771	7.90617	0.591944	6.4533	0.637612	9	10	2.7	1.44716	0.592593	1	1	1	36	1	0.30103	0.30103	0.30103	0.845098	1.23045	0.278754	3.25	0.809782	3.32193	4.80736	2.1181	1.9664
University of York	2.5	4	1	0	43	29	6.4186	0.725642	4.56744	0.52546	5.90007	0.709736	7.5	8.5	5.05882	1.64345	0.674419	6.25	16	1	0	0.929419	0.544068	0.69897	0.30103	0	1.47712	0.243038	2.875	0.770857	3.08746	5.45943	2.35769	1.74554
University of York	1.5	0	1	2	7	5	5.57143	0.684064	2.09524	0.388948	5.44171	0.678571	4.5	5.5	1.27273	0.90309	0.714286	2.25	0	1	4	0.740363	0.39794	0	0.30103	0.477121	0.778151	0.161368	2.125	0.735736	2.45943	3	2.25416	1.29206
University of York	5.5	0	1	0	37	12	7.43243	0.724819	7.62883	0.807353	4.64749	0.613118	6.5	7.5	4.93333	1.57978	0.324324	30.25	0	1	0	0.875061	0.812913	0	0.30103	0	1.11394	0.217484	2.625	0.667218	2.90689	5.24793	2.03673	2.68197
Aberdeen	5	3	1	0	25	11	4.64	0.609466	4.32933	0.645391	4.29996	0.570302	9	10	2.5	1.41497	0.44	25	9	1	0	1	0.778151	0.60206	0.30103	0	1.07918	0.278754	3.25	0.633464	3.32193	4.70044	1.8945	2.14394
Aberdeen	3.5	0	0	0	36	16	6.77778	0.717968	2.78241	0.474438	5.73286	0.606237	3.5	4.5	8	1.5682	0.444444	12.25	0	0	0	0.653213	0.653213	0	0	0	1.23045	0.130334	1.875	0.758371	2.16993	5.20946	2.01388	1.57605
Aberdeen	3	2	0	0	6	4	4.33333	0.597389	1.68333	0.376679	3.31933	0.425674	5	6	1	0.845098	0.666667	9	4	0	0	0.778151	0.60206	0.477121	0	0	0.69897	0.176091	2.25	0.521051	2.58496	2.80736	1.41406	1.2513
Aberdeen	3.5	0	1	0	12	0	9.16667	0.898254	1.86389	0.340966	3.55958	0.406923	4.5	5.5	2.18182	1.11394	0	12.25	0	1	0	0.740363	0.653213	0	0.30103	0	0	0.161368	2.125	0.551399	2.45943	3.70044	1.35177	1.13267
Aberdeen	3	1	1	0	26	8	5.11538	0.669891	10.375	0.91236	5.12504	0.6641	5	6	4.33333	1.43136	0.307692	9	1	1	0	0.778151	0.60206	0.30103	0.30103	0	0.954243	0.176091	2.25	0.709697	2.58496	4.75489	2.20609	3.0308
Aberdeen	13	1	0.5	0	20	11	4.1	0.577983	1.545	0.339094	3.16475	0.478358	14.5	15.5	1.29032	1.32222	0.55	169	1	0.25	0	1.19033	1.14613	0.30103	0.176091	0	1.07918	0.389166	4.625	0.500339	3.9542	4.39232	1.58907	1.12645
Aberdeen	4	1.75	0	0	51	25	6.01961	0.73494	1.6585	0.362694	1.79188	0.22314	5.75	6.75	7.55556	1.716	0.490196	16	3.0625	0	0	0.829304	0.69897	0.439333	0	0	1.41497	0.197281	2.4375	0.253309	2.75489	5.70044	0.741257	1.20484
Aberdeen	4.5	1	1	0	36	20	5.55556	0.690621	3.21481	0.512158	4.64417	0.545651	6.5	7.5	4.8	1.5682	0.555556	20.25	1	1	0	0.875061	0.740363	0.30103	0.30103	0	1.32222	0.217484	2.625	0.666908	2.90689	5.20946	1.81261	1.70135
Aberdeen	7	2	2.5	3	33	11	7.69697	0.816658	4.82172	0.624277	3.52894	0.44022	14.5	15.5	2.12903	1.53148	0.333333	49	4	6.25	9	1.19033	0.90309	0.477121	0.544068	0.60206	1.07918	0.389166	4.625	0.547644	3.9542	5.08747	1.46238	2.0738
Aberdeen	3	4	1	0	42	22	4.57143	0.572319	8.48571	0.798961	5.69415	0.650272	8	9	4.66667	1.63347	0.52381	9	16	1	0	0.954243	0.60206	0.69897	0.30103	0	1.36173	0.255273	3	0.755429	3.16993	5.42627	2.16016	2.65409
Aberdeen	6	14	0	3	121	67	9.02479	0.837002	5.15138	0.655207	5.37997	0.573555	23	24	5.04167	2.08636	0.553719	36	196	0	9	1.38021	0.845098	1.17609	0	0.60206	1.83251	0.518514	6.75	0.73078	4.58497	6.93074	1.90531	2.17655
Bangor	8	0	2	0	2	1	8	0.89967	2	0.451545	7.197	0.849721	10	11	0.181818	0.477121	0.5	64	0	4	0	1.04139	0.954243	0	0.477121	0	0.30103	0.30103	3.5	0.857152	3.45943	1.58496	2.82271	1.5
Bangor	6	0.5	0.25	1	24	7	6.25	0.751942	3.66875	0.464713	6.16133	0.605932	7.75	8.75	2.74286	1.39794	0.291667	36	0.25	0.0625	1	0.942008	0.845098	0.176091	0.09691	0.30103	0.90309	0.249198	2.9375	0.789675	3.12928	4.64386	2.01286	1.54374
Bangor	2	2	0.5	2	39	16	10.1795	0.93767	2.56667	0.486371	5.64895	0.608542	6.5	7.5	5.2	1.60206	0.410256	4	4	0.25	4	0.875061	0.477121	0.477121	0.176091	0.477121	1.23045	0.217484	2.625	0.751968	2.90689	5.32193	2.02153	1.61569
Cambridge	6	9	0	4	36	17	8.77778	0.842192	23.2356	1.04417	15.3831	1.0457	19	20	1.8	1.5682	0.472222	36	81	0	16	1.30103	0.845098	1	0	0.69897	1.25527	0.462398	5.75	1.18704	4.32193	5.20946	3.47375	3.46865
Cambridge	2	2	0	0	17	12	4.23529	0.49323	6.1451	0.573429	10.6135	0.867662	4	5	3.4	1.25527	0.705882	4	4	0	0	0.69897	0.477121	0.477121	0	0	1.11394	0.146128	2	1.02586	2.32193	4.16993	2.88231	1.90489
Cambridge	2	1	0	1	4	4	2.75	0.345053	2.5	0.42031	4.58125	0.618535	4	5	0.8	0.69897	1	4	1	0	1	0.69897	0.477121	0.30103	0	0.30103	0.69897	0.146128	2	0.660984	2.32193	2.32193	2.05473	1.39624
Cambridge	4	3	0	0	22	16	5.13636	0.560861	7.85985	0.677403	8.158	0.762574	7	8	2.75	1.36173	0.727273	16	9	0	0	0.90309	0.69897	0.60206	0	0	1.23045	0.230449	2.75	0.911584	3	4.52356	2.53322	2.25029
Cambridge	3	1	0	1	22	14	5.59091	0.686533	3.29848	0.494793	6.21845	0.715067	5	6	3.66667	1.36173	0.636364	9	1	0	1	0.778151	0.60206	0.30103	0	0.30103	1.17609	0.176091	2.25	0.793682	2.58496	4.52356	2.3754	1.64367
Cambridge	1	1	0	1	3	1	8	0.706858	16.9667	1.18115	4.20433	0.597328	3	4	0.75	0.60206	0.333333	1	1	0	1	0.60206	0.30103	0.30103	0	0.30103	0.30103	0.113943	1.75	0.623697	2	2	1.98428	3.92368
Cambridge	3	2	0	0	7	4	9.28571	0.91433	1.75952	0.35884	5.07186	0.681815	5	6	1.16667	0.90309	0.571429	9	4	0	0	0.778151	0.60206	0.477121	0	0	0.69897	0.176091	2.25	0.705167	2.58496	3	2.26494	1.19204
Cambridge	2	5	0	0	29	11	9	0.820549	7.52299	0.632118	8.20454	0.811681	7	8	3.625	1.47712	0.37931	4	25	0	0	0.90309	0.477121	0.778151	0	0	1.07918	0.230449	2.75	0.914054	3	4.90689	2.69635	2.09985
Cambridge	2	5	0	0	17	14	2.88235	0.335323	5.00588	0.400674	14.1123	0.989385	7	8	2.125	1.25527	0.823529	4	25	0	0	0.90309	0.477121	0.778151	0	0	1.17609	0.230449	2.75	1.1496	3	4.16993	3.28667	1.33101
Cambridge	0	1	0	1	20	6	10.15	0.863437	4.475	0.525467	6.6037	0.710059	2	3	6.66667	1.32222	0.3	0	1	0	1	0.477121	0	0.30103	0	0.30103	0.845098	0.0791812	1.5	0.819787	1.58496	4.39232	2.35877	1.74557
Cambridge	4	3	0	0	12	6	6.75	0.70964	2.72222	0.402663	8.683	0.847573	7	8	1.5	1.11394	0.5	16	9	0	0	0.90309	0.69897	0.60206	0	0	0.845098	0.230449	2.75	0.93867	3	3.70044	2.81558	1.33762
Cambridge	3	1	0	0	3	0	10.3333	0.97476	16.5833	1.06507	15.717	1.07563	4	5	0.6	0.60206	0	9	1	0	0	0.69897	0.60206	0.30103	0	0	0	0.146128	2	1.19637	2.32193	2	3.57318	3.53809
Cambridge	2.5	3	0	1	2	1	5	0.69897	3.3	0.524609	2.914	0.46449	6.5	7.5	0.266667	0.477121	0.5	6.25	9	0	1	0.875061	0.544068	0.60206	0	0.30103	0.30103	0.217484	2.625	0.46449	2.90689	1.58496	1.543	1.74271
Cambridge	1	0	0	1	4	3	4.5	0.614848	1.95833	0.409761	4.7635	0.658998	2	3	1.33333	0.69897	0.75	1	0	0	1	0.477121	0.30103	0	0	0.30103	0.60206	0.0791812	1.5	0.677926	1.58496	2.32193	2.18914	1.3612
Cambridge	0	2	0	0	5	2	12	1.01638	14.3	0.990369	15.2632	1.08393	2	3	1.66667	0.778151	0.4	0	4	0	0	0.477121	0	0.477121	0	0	0.477121	0.0791812	1.5	1.18365	1.58496	2.58496	3.60075	3.28994
Cambridge	3	1	0	0	6	5	7.83333	0.747193	3.48889	0.555931	7.99283	0.855112	4	5	1.2	0.845098	0.833333	9	1	0	0	0.69897	0.60206	0.30103	0	0	0.778151	0.146128	2	0.902701	2.32193	2.80736	2.84062	1.84676
Cambridge	4	4	0	1	28	18	5.89286	0.707993	5.59524	0.640687	5.76139	0.686618	9	10	2.8	1.4624	0.642857	16	16	0	1	1	0.69897	0.69897	0	0.30103	1.27875	0.278754	3.25	0.760527	3.32193	4.85798	2.2809	2.12832
Cambridge	2	5	1	0	11	5	20.6364	0.979515	7.22727	0.529683	9.25309	0.755628	8	9	1.22222	1.07918	0.454545	4	25	1	0	0.954243	0.477121	0.778151	0.30103	0	0.778151	0.255273	3	0.966287	3.16993	3.58496	2.51014	1.75957
Cambridge	1	3	0	0	23	6	8.91304	0.862965	4.60797	0.531584	11.6952	0.823887	4	5	4.6	1.38021	0.26087	1	9	0	0	0.69897	0.30103	0.60206	0	0	0.845098	0.146128	2	1.06801	2.32193	4.58497	2.7369	1.76588
Cambridge	2	2	0	0	18	12	5.55556	0.578028	1.31944	0.220084	4.48411	0.622474	4	5	3.6	1.27875	0.666667	4	4	0	0	0.69897	0.477121	0.477121	0	0	1.11394	0.146128	2	0.651676	2.32193	4.24793	2.06782	0.731104
Cambridge	3	4	1	2	37	19	11.5135	0.856806	11.0428	0.751205	12.5632	0.984278	10	11	3.36364	1.57978	0.513514	9	16	1	4	1.04139	0.60206	0.69897	0.30103	0.477121	1.30103	0.30103	3.5	1.0991	3.45943	5.24793	3.2697	2.49545
Cambridge	2	1	1	5	28	4	11.7143	1.01006	7.54643	0.53081	6.28529	0.686531	9	10	2.8	1.4624	0.142857	4	1	1	25	1	0.477121	0.30103	0.30103	0.778151	0.69897	0.278754	3.25	0.798325	3.32193	4.85798	2.28061	1.76331
Cambridge	1.5	3	0	0	13	4	14.4615	0.897275	8.37692	0.767373	12.353	0.963497	4.5	5.5	2.36364	1.14613	0.307692	2.25	9	0	0	0.740363	0.39794	0.60206	0	0	0.69897	0.161368	2.125	1.09177	2.45943	3.80736	3.20067	2.54916
Cambridge	5.5	1.5	0.5	0	18	10	6.05556	0.646135	3.06759	0.449892	5.10717	0.651962	7.5	8.5	2.11765	1.27875	0.555556	30.25	2.25	0.25	0	0.929419	0.812913	0.39794	0.176091	0	1.04139	0.243038	2.875	0.70818	3.08746	4.24793	2.16577	1.49451
Cambridge	6	9	0	3	53	20	8.64151	0.798648	6.50723	0.636785	10.5574	0.813877	18	19	2.78947	1.73239	0.377358	36	81	0	9	1.27875	0.845098	1	0	0.60206	1.32222	0.447158	5.5	1.02356	4.24793	5.75489	2.70364	2.11535
Cambridge	2	0	0	0	8	3	5.875	0.714233	4.05833	0.557125	5.32163	0.698081	2	3	2.66667	0.954243	0.375	4	0	0	0	0.477121	0.477121	0	0	0	0.60206	0.0791812	1.5	0.726044	1.58496	3.16993	2.31898	1.85073
Cambridge	3	1	1	1.5	24	7	7.29167	0.799007	6.66111	0.583141	8.25388	0.735688	6.5	7.5	3.2	1.39794	0.291667	9	1	1	2.25	0.875061	0.60206	0.30103	0.30103	0.39794	0.90309	0.217484	2.625	0.916658	2.90689	4.64386	2.4439	1.93715
Cambridge	4	6	1	2	17	0	4.23529	0.542612	6.31471	0.63722	15.5173	1.10427	13	14	1.21429	1.25527	0	16	36	1	4	1.14613	0.69897	0.845098	0.30103	0.477121	0	0.361728	4.25	1.19082	3.80736	4.16993	3.66832	2.1168
Cambridge	1	6	1	2	24	23	3.75	0.50293	4.23958	0.558917	11.0393	0.914695	10	11	2.18182	1.39794	0.958333	1	36	1	4	1.04139	0.30103	0.845098	0.30103	0.477121	1.38021	0.30103	3.5	1.04294	3.45943	4.64386	3.03855	1.85668
Cambridge	0	5	0	0	9	1	7.11111	0.796753	99.7278	1.56786	16.0256	1.086	5	6	1.5	1	0.111111	0	25	0	0	0.778151	0	0.778151	0	0	0.30103	0.176091	2.25	1.20481	2.58496	3.32193	3.60763	5.20831
Cambridge	1	3	1	1	8	7	3	0.448041	9.68125	0.82853	9.472	0.930395	6	7	1.14286	0.954243	0.875	1	9	1	1	0.845098	0.30103	0.60206	0.30103	0.30103	0.90309	0.20412	2.5	0.976442	2.80736	3.16993	3.09071	2.75232
Cambridge	1	1	0	0	11	7	5.81818	0.629503	15.9924	0.891135	15.1751	0.968173	2	3	3.66667	1.07918	0.636364	1	1	0	0	0.477121	0.30103	0.30103	0	0	0.90309	0.0791812	1.5	1.18113	1.58496	3.58496	3.2162	2.96029
Cambridge	5	2	0.5	0	3	1	6.33333	0.715376	7.27778	0.894048	4.162	0.594045	7.5	8.5	0.352941	0.60206	0.333333	25	4	0.25	0	0.929419	0.778151	0.477121	0.176091	0	0.30103	0.243038	2.875	0.619302	3.08746	2	1.97338	2.96997
Cambridge	2	5	1	0	26	20	5.53846	0.6522	11.4712	0.838319	18.2174	1.14021	8	9	2.88889	1.43136	0.769231	4	25	1	0	0.954243	0.477121	0.778151	0.30103	0	1.32222	0.255273	3	1.26049	3.16993	4.75489	3.78769	2.78484
Cambridge	4	5	0	0	16	13	4.1875	0.503784	5.74688	0.514556	11.5414	0.962474	9	10	1.6	1.23045	0.8125	16	25	0	0	1	0.69897	0.778151	0	0	1.14613	0.278754	3.25	1.06226	3.32193	4.08747	3.19727	1.70932
Cambridge	4	4	0	0	26	14	5.65385	0.66277	4.27628	0.547501	11.4725	0.956132	8	9	2.88889	1.43136	0.538462	16	16	0	0	0.954243	0.69897	0.69897	0	0	1.17609	0.255273	3	1.05966	3.16993	4.75489	3.1762	1.81876
Cambridge	5	2	1	1	18	10	4.55556	0.577743	4.53241	0.444734	7.6805	0.750804	9	10	1.8	1.27875	0.555556	25	4	1	1	1	0.778151	0.477121	0.30103	0.30103	1.04139	0.278754	3.25	0.885389	3.32193	4.24793	2.49412	1.47737
Cambridge	5	4	3	2	31	21	8.90323	0.741276	11.5828	0.918818	12.2126	0.948101	14	15	2.06667	1.50515	0.677419	25	16	9	4	1.17609	0.778151	0.69897	0.60206	0.477121	1.34242	0.380211	4.5	1.08681	3.90689	5	3.14953	3.05225
Cambridge	3	0	0	0	19	14	5.89474	0.654459	4.77018	0.585234	5.74605	0.643018	3	4	4.75	1.30103	0.736842	9	0	0	0	0.60206	0.60206	0	0	0	1.17609	0.113943	1.75	0.75937	2	4.32193	2.13606	1.94411
Cambridge	0	1	0.5	1	21	9	4.42857	0.599258	3.26349	0.537917	4.69252	0.627594	2.5	3.5	6	1.34242	0.428571	0	1	0.25	1	0.544068	0	0.30103	0.176091	0.30103	1	0.09691	1.625	0.671406	1.80736	4.45943	2.08482	1.78692
Cambridge	1	0	0	0	41	28	3.87805	0.506461	2.04512	0.41176	3.58944	0.496689	1	2	20.5	1.62325	0.682927	1	0	0	0	0.30103	0.30103	0	0	0	1.4624	0.0413927	1.25	0.555027	1	5.39232	1.64997	1.36784
Cambridge	2	1	0	0	28	17	3.14286	0.451318	1.3006	0.239492	5.76075	0.399005	3	4	7	1.4624	0.607143	4	1	0	0	0.60206	0.477121	0.30103	0	0	1.25527	0.113943	1.75	0.760479	2	4.85798	1.32547	0.795575
Cambridge	0	0	0	0	31	25	2.67742	0.354313	0.624731	0.144549	0.979032	-0.0858733	0	1	31	1.50515	0.806452	0	0	0	0	0	0	0	0	0	1.41497	0	1	-0.009203	0	5	-0.285265	0.480181
Cambridge	2	4	4	0	49	17	46.4694	1.15584	65.9619	1.23081	14.7874	1.02819	10	11	4.45455	1.69897	0.346939	4	16	16	0	1.04139	0.477121	0.69897	0.69897	0	1.25527	0.30103	3.5	1.16989	3.45943	5.64386	3.41556	4.08868
Cambridge	4	1	0	1	44	40	3.09091	0.458409	1.42992	0.29089	3.34391	0.497481	6	7	6.28571	1.65321	0.909091	16	1	0	1	0.845098	0.69897	0.30103	0	0.30103	1.61278	0.20412	2.5	0.524254	2.80736	5.49186	1.6526	0.966316
Cambridge	3	2	0	0	23	13	12.1304	0.751743	8.97319	0.708541	13.7864	0.958242	5	6	3.83333	1.38021	0.565217	9	4	0	0	0.778151	0.60206	0.477121	0	0	1.14613	0.176091	2.25	1.13945	2.58496	4.58497	3.18321	2.35372
Cambridge	7	1	0	3	46	30	9.54348	0.801411	9.52101	0.737851	8.59446	0.79587	11	12	3.83333	1.6721	0.652174	49	1	0	9	1.07918	0.90309	0.30103	0	0.60206	1.49136	0.322219	3.75	0.934218	3.58496	5.55459	2.64382	2.45109
Cambridge	3	4	2.5	0	21	16	5.95238	0.669825	1.07143	0.198236	4.19095	0.58604	9.5	10.5	2	1.34242	0.761905	9	16	6.25	0	1.02119	0.60206	0.69897	0.544068	0	1.23045	0.290035	3.375	0.622312	3.39232	4.45943	1.94678	0.658526
Cambridge	2	1	0	1	20	13	4.7	0.54683	2.86917	0.464177	5.71785	0.612804	4	5	4	1.32222	0.65	4	1	0	1	0.69897	0.477121	0.30103	0	0.30103	1.14613	0.146128	2	0.757233	2.32193	4.39232	2.03569	1.54196
Cambridge	2	9	0	0	43	24	11.2558	0.74432	7.68798	0.654847	10.5623	0.890377	11	12	3.58333	1.64345	0.55814	4	81	0	0	1.07918	0.477121	1	0	0	1.39794	0.322219	3.75	1.02376	3.58496	5.45943	2.95777	2.17536
Cambridge	2	7	0	0	57	37	6.54386	0.694779	6.36901	0.610731	8.0537	0.796728	9	10	5.7	1.76343	0.649123	4	49	0	0	1	0.477121	0.90309	0	0	1.57978	0.278754	3.25	0.905996	3.32193	5.85798	2.64667	2.02881
Cambridge	1.5	2	0	3	69	24	37.1594	1.11542	22.5179	0.777294	13.1871	0.941733	6.5	7.5	9.2	1.8451	0.347826	2.25	4	0	9	0.875061	0.39794	0.477121	0	0.60206	1.39794	0.217484	2.625	1.12015	2.90689	6.12929	3.12837	2.58211
Cambridge	0	2	0	2	3	0	7.33333	0.864429	4.06667	0.473868	10.129	0.783559	4	5	0.6	0.60206	0	0	4	0	4	0.69897	0	0.477121	0	0.477121	0	0.146128	2	1.00557	2.32193	2	2.60293	1.57416
Cambridge	1	2	0	0	19	6	20.4211	1.13457	13.607	0.462694	5.65074	0.713189	3	4	4.75	1.30103	0.315789	1	4	0	0	0.60206	0.30103	0.477121	0	0	0.845098	0.113943	1.75	0.752105	2	4.32193	2.36916	1.53704
Cambridge	3	1	0	2	19	5	13.4211	0.999131	9.8693	0.849517	15.5959	1.03861	6	7	2.71429	1.30103	0.263158	9	1	0	4	0.845098	0.60206	0.30103	0	0.477121	0.778151	0.20412	2.5	1.19301	2.80736	4.32193	3.45018	2.82204
Cambridge	2	4	0	1	74	17	38.7568	1.17486	37.136	1.11277	13.7315	0.999286	7	8	9.25	1.87506	0.22973	4	16	0	1	0.90309	0.477121	0.69897	0	0.30103	1.25527	0.230449	2.75	1.13772	3	6.22882	3.31956	3.69653
Cambridge	2	5	2	0	39	11	45.3077	1.07261	26.038	0.855302	12.3309	0.919749	9	10	3.9	1.60206	0.282051	4	25	4	0	1	0.477121	0.778151	0.477121	0	1.07918	0.278754	3.25	1.09099	3.32193	5.32193	3.05534	2.84125
Cambridge	3	6	2	2	35	6	14.7714	0.958278	7.29857	0.67503	8.24057	0.793663	13	14	2.5	1.5563	0.171429	9	36	4	4	1.14613	0.60206	0.845098	0.477121	0.477121	0.845098	0.361728	4.25	0.915957	3.80736	5.16993	2.63649	2.2424
Cambridge	2	3	0	1	66	16	61.7273	1.32496	43.5205	1.12732	18.1955	1.12356	6	7	9.42857	1.82607	0.242424	4	9	0	1	0.845098	0.477121	0.60206	0	0.30103	1.23045	0.20412	2.5	1.25996	2.80736	6.06609	3.7324	3.74488
Cambridge	0	1	0	0	30	12	13.3	0.95307	6.85389	0.71808	9.9792	0.900319	1	2	15	1.49136	0.4	0	1	0	0	0.30103	0	0.30103	0	0	1.11394	0.0413927	1.25	0.999096	1	4.9542	2.9908	2.38541
Cambridge	2	4	0	2	14	4	8.78571	0.878916	6.5881	0.65451	10.5807	0.931653	8	9	1.55556	1.17609	0.285714	4	16	0	4	0.954243	0.477121	0.69897	0	0.477121	0.69897	0.255273	3	1.02451	3.16993	3.90689	3.09489	2.17423
Cambridge	4	2	0	0	20	10	13.15	0.897557	16.4533	0.779298	12.4674	0.885484	6	7	2.85714	1.32222	0.5	16	4	0	0	0.845098	0.69897	0.477121	0	0	1.04139	0.20412	2.5	1.09578	2.80736	4.39232	2.94152	2.58877
Cambridge	7	6	0	2	32	13	8.90625	0.838119	11.5437	0.822627	7.13391	0.731371	15	16	2	1.51851	0.40625	49	36	0	4	1.20412	0.90309	0.845098	0	0.477121	1.14613	0.39794	4.75	0.853327	4	5.0444	2.42956	2.73271
Cambridge	6	0	0	1	26	16	11.7308	0.950991	5.69872	0.617576	8.72024	0.783491	7	8	3.25	1.43136	0.615385	36	0	0	1	0.90309	0.845098	0	0	0.30103	1.23045	0.230449	2.75	0.940528	3	4.75489	2.6027	2.05154
Cambridge	14	4	0	6	12	8	5.91667	0.689481	10.5278	0.835531	11.383	0.82339	24	25	0.48	1.11394	0.666667	196	16	0	36	1.39794	1.17609	0.69897	0	0.845098	0.954243	0.531479	7	1.05626	4.64386	3.70044	2.73525	2.77558
Cardiff	2	1	1	0	36	21	5.13889	0.645529	2.01574	0.400437	4.07414	0.534615	4	5	7.2	1.5682	0.583333	4	1	1	0	0.69897	0.477121	0.30103	0.30103	0	1.34242	0.146128	2	0.610036	2.32193	5.20946	1.77595	1.33022
Dundee	3	7	0	4	65	26	8	0.834841	10.2764	0.82415	7.54015	0.765501	14	15	4.33333	1.81954	0.4	9	49	0	16	1.17609	0.60206	0.90309	0	0.69897	1.43136	0.380211	4.5	0.87738	3.90689	6.0444	2.54294	2.73777
Dundee	1	1	0	0	2	2	4	0.588046	3.25	0.437531	6.86	0.835824	2	3	0.666667	0.477121	1	1	1	0	0	0.477121	0.30103	0.30103	0	0	0.477121	0.0791812	1.5	0.836324	1.58496	1.58496	2.77655	1.45345
Dundee	2	3	0	0	6	1	10.1667	0.924025	6.66667	0.617222	5.12683	0.636773	5	6	1	0.845098	0.166667	4	9	0	0	0.778151	0.477121	0.60206	0	0	0.30103	0.176091	2.25	0.709849	2.58496	2.80736	2.11532	2.05037
Dundee	2	3	2	3	36	11	8.22222	0.82553	13.819	0.811389	8.27708	0.821416	10	11	3.27273	1.5682	0.305556	4	9	4	9	1.04139	0.477121	0.60206	0.477121	0.60206	1.07918	0.30103	3.5	0.917877	3.45943	5.20946	2.72869	2.69538
Dundee	9	3	1	0	21	11	14	0.96815	8.33651	0.774694	7.5731	0.747895	13	14	1.5	1.34242	0.52381	81	9	1	0	1.14613	1	0.60206	0.30103	0	1.07918	0.361728	4.25	0.879274	3.80736	4.45943	2.48446	2.57348
Dundee	3	8	2	0	26	16	5.30769	0.624882	4.43013	0.608628	9.27756	0.927589	13	14	1.85714	1.43136	0.615385	9	64	4	0	1.14613	0.60206	0.954243	0.477121	0	1.23045	0.361728	4.25	0.967434	3.80736	4.75489	3.08139	2.02182
Dundee	6	6	1	3	25	20	5.76	0.710423	4.94933	0.551185	10.1018	0.88235	16	17	1.47059	1.41497	0.8	36	36	1	9	1.23045	0.845098	0.845098	0.30103	0.60206	1.32222	0.414973	5	1.0044	4.08747	4.70044	2.93111	1.831
Dundee	3	2	0	2	7	5	7.57143	0.838395	3.7	0.60213	5.23271	0.688763	7	8	0.875	0.90309	0.714286	9	4	0	4	0.90309	0.60206	0.477121	0	0.477121	0.778151	0.230449	2.75	0.718727	3	3	2.28802	2.00023
Dundee	3	1	0	0	18	8	6.22222	0.724064	4.05926	0.560619	6.37594	0.708975	4	5	3.6	1.27875	0.444444	9	1	0	0	0.69897	0.60206	0.30103	0	0	0.954243	0.146128	2	0.804545	2.32193	4.24793	2.35516	1.86234
Dundee	3	2	0	0	9	8	2.55556	0.322566	1.92222	0.409674	6.25689	0.743757	5	6	1.5	1	0.888889	9	4	0	0	0.778151	0.60206	0.477121	0	0	0.954243	0.176091	2.25	0.796358	2.58496	3.32193	2.47071	1.36091
Dundee	1	1	0	1	47	16	6.23404	0.725468	2.72518	0.409022	4.914	0.648054	3	4	11.75	1.68124	0.340426	1	1	0	1	0.60206	0.30103	0.30103	0	0.30103	1.23045	0.113943	1.75	0.691435	2	5.58497	2.15279	1.35874
Dundee	3	2	0.5	0	10	5	5.8	0.690779	2.22833	0.436395	5.5617	0.704151	5.5	6.5	1.53846	1.04139	0.5	9	4	0.25	0	0.812913	0.60206	0.477121	0.176091	0	0.778151	0.190332	2.375	0.745208	2.70044	3.45943	2.33914	1.44968
Dundee	4	4	0	1	42	26	7.71429	0.814382	4.11825	0.610393	6.52083	0.68303	9	10	4.2	1.63347	0.619048	16	16	0	1	1	0.69897	0.69897	0	0.30103	1.43136	0.278754	3.25	0.814303	3.32193	5.42627	2.26898	2.02768
Dundee	2	2	0	3	52	24	6.57692	0.749101	2.77885	0.423031	5.55418	0.657099	7	8	6.5	1.72428	0.461538	4	4	0	9	0.90309	0.477121	0.477121	0	0.60206	1.39794	0.230449	2.75	0.74462	3	5.72792	2.18284	1.40528
Dundee	3	1	0	0	17	2	10.8235	0.993828	3.6951	0.587208	2.98247	0.373814	4	5	3.4	1.25527	0.117647	9	1	0	0	0.69897	0.60206	0.30103	0	0	0.477121	0.146128	2	0.474576	2.32193	4.16993	1.24178	1.95066
Dundee	5	1	0	0	20	19	3.2	0.461261	5.65167	0.518616	3.15742	0.4191	6	7	2.85714	1.32222	0.95	25	1	0	0	0.845098	0.778151	0.30103	0	0	1.30103	0.20412	2.5	0.499333	2.80736	4.39232	1.39222	1.72281
Dundee	2	1	0	1	8	2	165.125	1.09445	30.9167	0.856355	8.09887	0.853919	4	5	1.6	0.954243	0.25	4	1	0	1	0.69897	0.477121	0.30103	0	0.30103	0.477121	0.146128	2	0.908425	2.32193	3.16993	2.83666	2.84475
Dundee	1	4	0	3	22	12	5.54545	0.676361	4.82424	0.624018	11.5012	0.964603	8	9	2.44444	1.36173	0.545455	1	16	0	9	0.954243	0.30103	0.69897	0	0.60206	1.11394	0.255273	3	1.06074	3.16993	4.52356	3.20434	2.07295
Dundee	3	2	2	22	45	24	9.75556	0.920163	3.94667	0.563942	5.26622	0.593847	29	30	1.5	1.66276	0.533333	9	4	4	484	1.47712	0.60206	0.477121	0.477121	1.36173	1.39794	0.591065	8.25	0.721499	4.90689	5.52357	1.97272	1.87338
Dundee	2	1	0	0	2	2	4	0.539591	3.375	0.444651	7.1485	0.829481	3	4	0.5	0.477121	1	4	1	0	0	0.60206	0.477121	0.30103	0	0	0.477121	0.113943	1.75	0.854215	2	1.58496	2.75548	1.4771
Dundee	6	2	2	2	12	4	8.08333	0.813657	4.22222	0.596583	8.84558	0.8357	12	13	0.923077	1.11394	0.333333	36	4	4	4	1.11394	0.845098	0.477121	0.477121	0.477121	0.69897	0.342423	4	0.946726	3.70044	3.70044	2.77614	1.98181
Dundee	2	0	0	5	7	0	7.71429	0.876141	1.4	0.266316	10.4236	0.802577	7	8	0.875	0.90309	0	4	0	0	25	0.90309	0.477121	0	0	0.778151	0	0.230449	2.75	1.01802	3	3	2.6661	0.884684
Dundee	2	5	2	3	37	24	7.51351	0.79696	7.41622	0.74412	9.8733	0.879865	12	13	2.84615	1.57978	0.648649	4	25	4	9	1.11394	0.477121	0.778151	0.477121	0.60206	1.39794	0.342423	4	0.994462	3.70044	5.24793	2.92285	2.47192
Dundee	2	2	1	0	5	3	5.6	0.728888	4.16	0.619201	5.4392	0.657222	5	6	0.833333	0.778151	0.6	4	4	1	0	0.778151	0.477121	0.477121	0.30103	0	0.60206	0.176091	2.25	0.735535	2.58496	2.58496	2.18325	2.05694
Dundee	2	4	0	1	13	8	8.69231	0.712157	6.52564	0.696637	12.6875	0.872619	7	8	1.625	1.14613	0.615385	4	16	0	1	0.90309	0.477121	0.69897	0	0.30103	0.954243	0.230449	2.75	1.10337	3	3.80736	2.89878	2.31418
Dundee	1	2	1	0	30	20	6.7	0.642304	5.83389	0.636217	8.91238	0.817324	4	5	6	1.49136	0.666667	1	4	1	0	0.69897	0.30103	0.477121	0.30103	0	1.32222	0.146128	2	0.949994	2.32193	4.9542	2.71509	2.11347
Dundee	4	3	0	0	10	6	19.7	1.02711	12.725	0.900671	10.0198	0.84327	7	8	1.25	1.04139	0.6	16	9	0	0	0.90309	0.69897	0.60206	0	0	0.845098	0.230449	2.75	1.00086	3	3.45943	2.80128	2.99196
Dundee	3	1	0	1	20	16	5.75	0.69144	3.31083	0.474464	4.7281	0.653924	5	6	3.33333	1.32222	0.8	9	1	0	1	0.778151	0.60206	0.30103	0	0.30103	1.23045	0.176091	2.25	0.674687	2.58496	4.39232	2.17229	1.57614
Dundee	5	1	0	3	38	30	5.36842	0.670161	2.35	0.431107	4.55632	0.467358	9	10	3.8	1.59106	0.789474	25	1	0	9	1	0.778151	0.30103	0	0.60206	1.49136	0.278754	3.25	0.658614	3.32193	5.28541	1.55253	1.43211
Dundee	2	1	0	0	3	2	4.66667	0.666667	2.97222	0.59824	3.41833	0.390442	3	4	0.75	0.60206	0.666667	4	1	0	0	0.60206	0.477121	0.30103	0	0	0.477121	0.113943	1.75	0.533814	2	2	1.29702	1.98731
Dundee	1	0	0	0	7	5	6.42857	0.696338	17	1.07673	24.8207	1.3324	1	2	3.5	0.90309	0.714286	1	0	0	0	0.30103	0.30103	0	0	0	0.778151	0.0413927	1.25	1.39481	1	3	4.42614	3.57681
Dundee	0	3	0	1	9	4	147.333	1.09049	29.6796	1.01797	8.69267	0.864558	4	5	1.8	1	0.444444	0	9	0	1	0.69897	0	0.60206	0	0.30103	0.69897	0.146128	2	0.939153	2.32193	3.32193	2.872	3.38161
Dundee	0	0	0	0	14	12	4.14286	0.522623	6.55833	0.701586	8.63015	0.904758	0	1	14	1.17609	0.857143	0	0	0	0	0	0	0	0	0	1.11394	0	1	0.936019	0	3.90689	3.00554	2.33062
Dundee	1	5	0	8	54	31	6.55556	0.764805	5.88241	0.630436	7.58162	0.809798	14	15	3.6	1.74036	0.574074	1	25	0	64	1.17609	0.30103	0.778151	0	0.954243	1.50515	0.380211	4.5	0.879762	3.90689	5.78136	2.69009	2.09426
Dundee	0	2	1	5	32	22	4.9375	0.551541	4.69531	0.609523	7.71642	0.786805	8	9	3.55556	1.51851	0.6875	0	4	1	25	0.954243	0	0.477121	0.30103	0.778151	1.36173	0.255273	3	0.887416	3.16993	5.0444	2.61371	2.02479
Dundee	1	1	0	1	19	12	6.31579	0.744313	4.44123	0.599232	5.38789	0.689884	3	4	4.75	1.30103	0.631579	1	1	0	1	0.60206	0.30103	0.30103	0	0.30103	1.11394	0.113943	1.75	0.731419	2	4.32193	2.29174	1.99061
Dundee	4	1	8	13	23	7	7.86957	0.838924	0.0108696	0.00421348	5.74209	0.754055	26	27	0.851852	1.38021	0.304348	16	1	64	169	1.43136	0.69897	0.30103	0.954243	1.14613	0.90309	0.556303	7.5	0.75907	4.75489	4.58497	2.50492	0.0139969
Dundee	7	0	1	1	8	7	5.625	0.680208	3.26667	0.599086	5.48337	0.702318	9	10	0.8	0.954243	0.875	49	0	1	1	1	0.90309	0	0.30103	0.30103	0.90309	0.278754	3.25	0.739048	3.32193	3.16993	2.33305	1.99012
Dundee	3	1	0	0	4	3	11.25	0.992819	8.35	0.73976	5.75025	0.706584	4	5	0.8	0.69897	0.75	9	1	0	0	0.69897	0.60206	0.30103	0	0	0.60206	0.146128	2	0.759687	2.32193	2.32193	2.34722	2.45743
Dundee	3	1	0	2	17	10	6.70588	0.727452	3.55882	0.48012	8.00659	0.800537	6	7	2.42857	1.25527	0.588235	9	1	0	4	0.845098	0.60206	0.30103	0	0.477121	1.04139	0.20412	2.5	0.903447	2.80736	4.16993	2.65933	1.59492
Dundee	1	1	0	0	8	8	2.625	0.36067	1.64583	0.334345	3.80362	0.538392	2	3	2.66667	0.954243	1	1	1	0	0	0.477121	0.30103	0.30103	0	0	0.954243	0.0791812	1.5	0.580198	1.58496	3.16993	1.7885	1.11067
Dundee	1	0	0	0	10	5	7.1	0.817078	3.72	0.590812	7.1172	0.777318	1	2	5	1.04139	0.5	1	0	0	0	0.30103	0.30103	0	0	0	0.778151	0.0413927	1.25	0.852309	1	3.45943	2.5822	1.96264
Dundee	2	4	0	2	28	13	6.96429	0.751814	7.52143	0.782972	12.0563	0.975435	8	9	3.11111	1.4624	0.464286	4	16	0	4	0.954243	0.477121	0.69897	0	0.477121	1.14613	0.255273	3	1.08121	3.16993	4.85798	3.24033	2.60098
Dundee	5	1	0	3	36	15	6.86111	0.786494	5.71759	0.646753	6.51786	0.697677	9	10	3.6	1.5682	0.416667	25	1	0	9	1	0.778151	0.30103	0	0.60206	1.20412	0.278754	3.25	0.814105	3.32193	5.20946	2.31763	2.14847
Dundee	2	1	0	0	9	1	10.1111	0.979645	7.16667	0.772674	7.93889	0.818762	3	4	2.25	1	0.111111	4	1	0	0	0.60206	0.477121	0.30103	0	0	0.30103	0.113943	1.75	0.89976	2	3.32193	2.71987	2.56677
Dundee	0	0	0.5	0	38	0	9.26316	0.924626	4.84474	0.580897	5.62216	0.71285	0.5	1.5	25.3333	1.59106	0	0	0	0.25	0	0.176091	0	0	0.176091	0	0	0.0211893	1.125	0.749903	0.584963	5.28541	2.36804	1.9297
Dundee	0	0	0	7	27	3	13.2593	1.04958	5.30309	0.652833	6.76659	0.658171	7	8	3.375	1.44716	0.111111	0	0	0	49	0.90309	0	0	0	0.90309	0.60206	0.230449	2.75	0.83037	3	4.80736	2.1864	2.16866
Dundee	4	1	2	1	24	16	5.83333	0.694087	3.575	0.525673	6.93804	0.78131	8	9	2.66667	1.39794	0.666667	16	1	4	1	0.954243	0.69897	0.30103	0.477121	0.30103	1.23045	0.255273	3	0.841237	3.16993	4.64386	2.59546	1.74625
Dundee	4	3	0	2	12	11	7.66667	0.778448	9.84444	0.828365	13.2741	0.966214	9	10	1.2	1.11394	0.916667	16	9	0	4	1	0.69897	0.60206	0	0.477121	1.07918	0.278754	3.25	1.123	3.32193	3.70044	3.20969	2.75177
Dundee	1	1	0	0	9	6	11.3333	0.874957	2.28889	0.382407	4.778	0.653029	2	3	3	1	0.666667	1	1	0	0	0.477121	0.30103	0.30103	0	0	0.845098	0.0791812	1.5	0.679246	1.58496	3.32193	2.16932	1.27033
Dundee	1	1	0	0	7	7	3.28571	0.465039	4.97619	0.671257	4.72571	0.642921	2	3	2.33333	0.90309	1	1	1	0	0	0.477121	0.30103	0.30103	0	0	0.90309	0.0791812	1.5	0.674467	1.58496	3	2.13574	2.22987
Dundee	7	2	0.5	0	25	13	5.64	0.696067	3.60533	0.544346	3.825	0.549866	9.5	10.5	2.38095	1.41497	0.52	49	4	0.25	0	1.02119	0.90309	0.477121	0.176091	0	1.14613	0.290035	3.375	0.582631	3.39232	4.70044	1.82662	1.80828
Dundee	0	2	1	3	11	8	11.3636	0.685502	5.45606	0.634772	10.113	0.871914	6	7	1.57143	1.07918	0.727273	0	4	1	9	0.845098	0	0.477121	0.30103	0.60206	0.954243	0.20412	2.5	1.00488	2.80736	3.58496	2.89644	2.10867
Dundee	2	1	1	0	7	5	7.85714	0.78565	6.86429	0.735656	10.9147	0.900643	4	5	1.4	0.90309	0.714286	4	1	1	0	0.69897	0.477121	0.30103	0.30103	0	0.778151	0.146128	2	1.03801	2.32193	3	2.99187	2.4438
Dundee	2	1	0	0	12	9	4.41667	0.59698	3.81667	0.639406	4.2595	0.594619	3	4	3	1.11394	0.75	4	1	0	0	0.60206	0.477121	0.30103	0	0	1	0.113943	1.75	0.629359	2	3.70044	1.97528	2.12406
Dundee	0	2	0	0	9	3	4.77778	0.655899	2.16296	0.428888	5.21522	0.663224	2	3	3	1	0.333333	0	4	0	0	0.477121	0	0.477121	0	0	0.60206	0.0791812	1.5	0.717273	1.58496	3.32193	2.20318	1.42473
Dundee	2	3	0	1	17	12	4.05882	0.553947	2.59412	0.39967	6.10188	0.724001	6	7	2.42857	1.25527	0.705882	4	9	0	1	0.845098	0.477121	0.60206	0	0.30103	1.11394	0.20412	2.5	0.785464	2.80736	4.16993	2.40508	1.32768
Dundee	2	4	0	3	14	10	6.57143	0.728872	5.3631	0.68802	10.3183	0.958983	9	10	1.4	1.17609	0.714286	4	16	0	9	1	0.477121	0.69897	0	0.60206	1.04139	0.278754	3.25	1.01361	3.32193	3.90689	3.18568	2.28556
Dundee	0	1	0	0	14	7	4.28571	0.552561	4.29643	0.531014	5.53664	0.642878	1	2	7	1.17609	0.5	0	1	0	0	0.30103	0	0.30103	0	0	0.90309	0.0413927	1.25	0.743247	1	3.90689	2.1356	1.76399
Dundee	1	3	3	1	5	2	8.2	0.855292	3.3	0.481308	7.192	0.817646	8	9	0.555556	0.778151	0.4	1	9	9	1	0.954243	0.30103	0.60206	0.60206	0.30103	0.477121	0.255273	3	0.85685	3.16993	2.58496	2.71616	1.59887
Dundee	0	1	0	0	10	4	9.7	0.862988	14.2	0.797757	9.4952	0.853939	1	2	5	1.04139	0.4	0	1	0	0	0.30103	0	0.30103	0	0	0.69897	0.0413927	1.25	0.977504	1	3.45943	2.83673	2.65009
Dundee	5	6	1	3	48	29	6.22917	0.707111	3.30729	0.44312	6.68308	0.698014	15	16	3	1.6902	0.604167	25	36	1	9	1.20412	0.778151	0.845098	0.30103	0.60206	1.47712	0.39794	4.75	0.824977	4	5.61471	2.31875	1.47201
Dundee	0	5	1	1	18	9	7.05556	0.7782	3.83704	0.576733	5.381	0.682419	7	8	2.25	1.27875	0.5	0	25	1	1	0.90309	0	0.778151	0.30103	0.30103	1	0.230449	2.75	0.730863	3	4.24793	2.26695	1.91587
Dundee	3	1	0	2	12	7	4.33333	0.529843	3.73889	0.581711	4.51792	0.607874	6	7	1.71429	1.11394	0.583333	9	1	0	4	0.845098	0.60206	0.30103	0	0.477121	0.90309	0.20412	2.5	0.654938	2.80736	3.70044	2.01932	1.9324
Dundee	0	0	1	2	16	14	4.25	0.562933	1.19792	0.26587	4.20256	0.591952	3	4	4	1.23045	0.875	0	0	1	4	0.60206	0	0	0.30103	0.477121	1.17609	0.113943	1.75	0.623514	2	4.08747	1.96642	0.8832
Dundee	0	0	0	10	27	9	10.2593	0.932661	4.11728	0.57979	5.3217	0.622414	10	11	2.45455	1.44716	0.333333	0	0	0	100	1.04139	0	0	0	1.04139	1	0.30103	3.5	0.726051	3.45943	4.80736	2.06762	1.92602
Dundee	1	1	1	3	6	4	6.5	0.719454	2.58889	0.430722	17.04	1.06617	6	7	0.857143	0.845098	0.666667	1	1	1	9	0.845098	0.30103	0.30103	0.30103	0.60206	0.69897	0.20412	2.5	1.23147	2.80736	2.80736	3.54175	1.43083
Glasgow	3	2	2	0.5	24	9	6.08333	0.727668	2.02292	0.390034	3.68346	0.527408	7.5	8.5	2.82353	1.39794	0.375	9	4	4	0.25	0.929419	0.60206	0.477121	0.477121	0.176091	1	0.243038	2.875	0.566256	3.08746	4.64386	1.75201	1.29567
Glasgow	3	2	2	0.5	38	21	5.34211	0.646061	2.26272	0.358662	3.89784	0.524455	7.5	8.5	4.47059	1.59106	0.552632	9	4	4	0.25	0.929419	0.60206	0.477121	0.477121	0.176091	1.34242	0.243038	2.875	0.590824	3.08746	5.28541	1.7422	1.19145
Glasgow	3	1	0.25	0	17	4	5	0.689302	1.04902	0.23472	4.13456	0.580532	4.25	5.25	3.2381	1.25527	0.235294	9	1	0.0625	0	0.720159	0.60206	0.30103	0.09691	0	0.69897	0.153815	2.0625	0.61643	2.39232	4.16993	1.92849	0.779723
Glasgow	3	0.5	1	0	13	9	4.92308	0.622008	1.67821	0.393302	5.016	0.650637	4.5	5.5	2.36364	1.14613	0.692308	9	0.25	1	0	0.740363	0.60206	0.176091	0.30103	0	1	0.161368	2.125	0.700358	2.45943	3.80736	2.16137	1.30652
Glasgow	1	2	1	1	17	14	6.35294	0.716866	4.70294	0.574211	6.41981	0.768404	5	6	2.83333	1.25527	0.823529	1	4	1	1	0.778151	0.30103	0.477121	0.30103	0.30103	1.17609	0.176091	2.25	0.807522	2.58496	4.16993	2.55258	1.90749
KCL	0	0	0	0	9	1	9.55556	0.943525	2.59259	0.429862	4.60322	0.644191	0	1	9	1	0.111111	0	0	0	0	0	0	0	0	0	0.30103	0	1	0.663062	0	3.32193	2.13996	1.42797
KCL	2	2	0	0	0	0	#NULL!	#NULL!	#NULL!	#NULL!	#NULL!	#NULL!	4	5	0	0	#NULL!	4	4	0	0	0.69897	0.477121	0.477121	0	0	0	0.146128	2	#NULL!	2.32193	0	#NULL!	#NULL!
KCL	3	2	0	1	2	0	70	1.82029	31.1667	1.463	21.863	1.23847	6	7	0.285714	0.477121	0	9	4	0	1	0.845098	0.60206	0.477121	0	0.30103	0	0.20412	2.5	1.33971	2.80736	1.58496	4.11411	4.85998
KCL	1	0	0	1	18	6	7.33333	0.81695	3.36204	0.452569	4.83589	0.637452	2	3	6	1.27875	0.333333	1	0	0	1	0.477121	0.30103	0	0	0.30103	0.845098	0.0791812	1.5	0.684476	1.58496	4.24793	2.11757	1.5034
KCL	0	0	0	0	7	2	70.8571	1.47619	8.85714	0.40662	9.49857	0.82677	0	1	7	0.90309	0.285714	0	0	0	0	0	0	0	0	0	0.477121	0	1	0.977658	0	3	2.74647	1.35076
KCL	1.75	0	0	0	11	8	4.18182	0.501273	4.77273	0.598249	4.366	0.628084	1.75	2.75	4	1.07918	0.727273	3.0625	0	0	0	0.439333	0.439333	0	0	0	0.954243	0.0700379	1.4375	0.640084	1.45943	3.58496	2.08645	1.98734
KCL	3	6	0.5	0	15	5	7.2	0.785099	2.83444	0.489029	5.61967	0.693778	9.5	10.5	1.42857	1.20412	0.333333	9	36	0.25	0	1.02119	0.60206	0.845098	0.176091	0	0.778151	0.290035	3.375	0.749711	3.39232	4	2.30468	1.62452
KCL	1.25	2	0	0	28	16	6.57143	0.747469	4.55476	0.528678	5.0275	0.666445	3.25	4.25	6.58824	1.4624	0.571429	1.5625	4	0	0	0.628389	0.352183	0.477121	0	0	1.23045	0.122216	1.8125	0.701352	2.08746	4.85798	2.21388	1.75623
KCL	0	0	0	0	1	1	2	0.30103	0	0	3.661	0.5636	0	1	1	0.30103	1	0	0	0	0	0	0	0	0	0	0.30103	0	1	0.5636	0	1	1.87224	0
KCL	2	2	2	0	13	10	4	0.541299	2.41538	0.388751	5.57846	0.633885	6	7	1.85714	1.14613	0.769231	4	4	4	0	0.845098	0.477121	0.477121	0.477121	0	1.04139	0.20412	2.5	0.746514	2.80736	3.80736	2.10572	1.2914
KCL	1	2	1	0	7	5	5.57143	0.639489	9.45476	0.904296	9.86386	0.796825	4	5	1.4	0.90309	0.714286	1	4	1	0	0.69897	0.30103	0.477121	0.30103	0	0.778151	0.146128	2	0.994047	2.32193	3	2.647	3.00401
KCL	2	5	0	0	8	8	2.5	0.357167	1.26042	0.273205	3.87538	0.391398	7	8	1	0.954243	1	4	25	0	0	0.90309	0.477121	0.778151	0	0	0.954243	0.230449	2.75	0.588314	3	3.16993	1.3002	0.907566
KCL	20	3	3	0	15	13	3.8	0.571466	2.23111	0.440123	2.8114	0.420889	26	27	0.555556	1.20412	0.866667	400	9	9	0	1.43136	1.32222	0.60206	0.60206	0	1.14613	0.556303	7.5	0.448923	4.75489	4	1.39816	1.46206
Liverpool John Moores	1	1	0	0	3	3	4	0.592717	0.633333	0.185434	1.71067	0.179847	2	3	1	0.60206	1	1	1	0	0	0.477121	0.30103	0.30103	0	0	0.60206	0.0791812	1.5	0.233165	1.58496	2	0.597438	0.615999
Liverpool John Moores	0	0	0	0	14	7	5.71429	0.728174	2.42262	0.446182	3.4365	0.475985	0	1	14	1.17609	0.5	0	0	0	0	0	0	0	0	0	0.90309	0	1	0.536116	0	3.90689	1.58119	1.48218
Liverpool John Moores	1.5	1	0	0	20	19	2.7	0.368909	1.81583	0.329361	7.2353	0.594904	2.5	3.5	5.71429	1.32222	0.95	2.25	1	0	0	0.544068	0.39794	0.30103	0	0	1.30103	0.09691	1.625	0.859457	1.80736	4.39232	1.97623	1.09411
Open	0	0	0	0	2	2	2	0.30103	0.166667	0.0624694	2.774	0.434301	0	1	2	0.477121	1	0	0	0	0	0	0	0	0	0	0.477121	0	1	0.443106	0	1.58496	1.44272	0.207519
Open	3	2	0	0.5	28	6	7.53571	0.806064	4.23036	0.573209	3.65429	0.509119	5.5	6.5	4.30769	1.4624	0.214286	9	4	0	0.25	0.812913	0.60206	0.477121	0	0.176091	0.845098	0.190332	2.375	0.562803	2.70044	4.85798	1.69126	1.90416
Open	4	2	0.25	1	56	8	8.64286	0.91055	4.10506	0.579416	4.84629	0.61932	7.25	8.25	6.78788	1.75587	0.142857	16	4	0.0625	1	0.916454	0.69897	0.477121	0.09691	0.30103	0.954243	0.236789	2.8125	0.685409	3.0444	5.83289	2.05734	1.92478
Open	0	0	1	0	15	4	4.86667	0.661849	1.93	0.345778	3.52385	0.525363	1	2	7.5	1.20412	0.266667	0	0	1	0	0.30103	0	0	0.30103	0	0.69897	0.0413927	1.25	0.547017	1	4	1.74522	1.14865
Queens Belfast	5	3	0	0	12	9	5.41667	0.703922	2.05	0.424053	3.47867	0.532446	8	9	1.33333	1.11394	0.75	25	9	0	0	0.954243	0.778151	0.60206	0	0	1	0.255273	3	0.541413	3.16993	3.70044	1.76875	1.40868
Queens Belfast	3	4	0	0	7	4	6.14286	0.739936	3.48333	0.551578	4.37271	0.633889	7	8	0.875	0.90309	0.571429	9	16	0	0	0.90309	0.60206	0.69897	0	0	0.69897	0.230449	2.75	0.640751	3	3	2.10574	1.8323
Queens Belfast	6	0	0	1	46	38	4.71739	0.613909	1.76739	0.355282	2.76911	0.418466	7	8	5.75	1.6721	0.826087	36	0	0	1	0.90309	0.845098	0	0	0.30103	1.59106	0.230449	2.75	0.44234	3	5.55459	1.39012	1.18022
St. Andrews	0	0	0	0	8	4	6.625	0.639675	4.375	0.509775	6.83437	0.768142	0	1	8	0.954243	0.5	0	0	0	0	0	0	0	0	0	0.69897	0	1	0.834699	0	3.16993	2.55171	1.69344
St. Andrews	5	1	0	0	25	24	2.96	0.422171	2.27467	0.41468	2.48404	0.280064	6	7	3.57143	1.41497	0.96	25	1	0	0	0.845098	0.778151	0.30103	0	0	1.39794	0.20412	2.5	0.395159	2.80736	4.70044	0.930354	1.37754
St. Andrews	4	4	0	1	29	24	3.13793	0.459925	1.5092	0.347516	4.32921	0.486579	9	10	2.9	1.47712	0.827586	16	16	0	1	1	0.69897	0.69897	0	0.30103	1.39794	0.278754	3.25	0.636408	3.32193	4.90689	1.61638	1.15442
St. Andrews	4	3	0	0	38	28	4.42105	0.503836	2.50088	0.395049	6.65994	0.654372	7	8	4.75	1.59106	0.736842	16	9	0	0	0.90309	0.69897	0.60206	0	0	1.4624	0.230449	2.75	0.823471	3	5.28541	2.17378	1.31232
St. Andrews	5.5	3	1.25	1	20	15	6.15	0.74472	2.4825	0.446082	2.8038	0.415899	10.75	11.75	1.70213	1.32222	0.75	30.25	9	1.5625	1	1.07004	0.812913	0.60206	0.352183	0.30103	1.20412	0.317018	3.6875	0.447747	3.55459	4.39232	1.38159	1.48185
St. Andrews	2.5	3.5	1	0	32	19	6.28125	0.658914	5.6625	0.477592	4.44503	0.56512	7	8	4	1.51851	0.59375	6.25	12.25	1	0	0.90309	0.544068	0.653213	0.30103	0	1.30103	0.230449	2.75	0.647875	3	5.0444	1.87729	1.58653
St. Andrews	3	3	0.25	0	15	8	4.46667	0.595998	1.54	0.299902	4.318	0.554481	6.25	7.25	2.06897	1.20412	0.533333	9	9	0.0625	0	0.860338	0.60206	0.60206	0.09691	0	0.954243	0.210853	2.5625	0.635283	2.85798	4	1.84195	0.996253
St. Andrews	3	1	0	0	5	1	7.4	0.844189	3.91667	0.65253	6.3936	0.781798	4	5	1	0.778151	0.2	9	1	0	0	0.69897	0.60206	0.30103	0	0	0.30103	0.146128	2	0.805745	2.32193	2.58496	2.59708	2.16766
St. Andrews	5.5	1	1	0	30	16	13.8667	0.695318	4.74389	0.465406	6.54967	0.639091	7.5	8.5	3.52941	1.49136	0.533333	30.25	1	1	0	0.929419	0.812913	0.30103	0.30103	0	1.23045	0.243038	2.875	0.816219	3.08746	4.9542	2.12302	1.54605
Warwick	7	1	1	0	26	16	5.73077	0.725814	3.26603	0.51287	4.21777	0.556871	9	10	2.6	1.43136	0.615385	49	1	1	0	1	0.90309	0.30103	0.30103	0	1.23045	0.278754	3.25	0.625083	3.32193	4.75489	1.84989	1.70372
Warwick	0	2	1	0	3	3	3.66667	0.53402	5.22222	0.715376	6.08333	0.697522	3	4	0.75	0.60206	1	0	4	1	0	0.60206	0	0.477121	0.30103	0	0.60206	0.113943	1.75	0.784142	2	2	2.31712	2.37643
Warwick	3	2	1	0	18	7	6	0.733324	4.66111	0.609817	5.78765	0.724684	6	7	2.57143	1.27875	0.388889	9	4	1	0	0.845098	0.60206	0.477121	0.30103	0	0.90309	0.20412	2.5	0.762502	2.80736	4.24793	2.40735	2.02577
Warwick	3	1	0	0	15	4	8.6	0.861013	5.33889	0.612798	4.66557	0.604339	4	5	3	1.20412	0.266667	9	1	0	0	0.69897	0.60206	0.30103	0	0	0.69897	0.146128	2	0.668905	2.32193	4	2.00757	2.03567
Warwick	4	3	0	0	39	28	4.74359	0.547124	3.25427	0.515912	4.08626	0.55509	7	8	4.875	1.60206	0.717949	16	9	0	0	0.90309	0.69897	0.60206	0	0	1.4624	0.230449	2.75	0.611326	3	5.32193	1.84397	1.71382
Warwick	1	1	0	0	4	2	7	0.687047	5.9375	0.430813	6.04375	0.539233	2	3	1.33333	0.69897	0.5	1	1	0	0	0.477121	0.30103	0.30103	0	0	0.477121	0.0791812	1.5	0.781306	1.58496	2.32193	1.79129	1.43113
Warwick	5	1	1	0	11	8	5.09091	0.651697	2.48182	0.436708	3.82409	0.500823	7	8	1.375	1.07918	0.727273	25	1	1	0	0.90309	0.778151	0.30103	0.30103	0	0.954243	0.230449	2.75	0.582528	3	3.58496	1.6637	1.45071
Warwick	0	0	0	0	14	4	7.07143	0.796087	1.88929	0.403517	3.98386	0.583335	0	1	14	1.17609	0.285714	0	0	0	0	0	0	0	0	0	0.69897	0	1	0.600304	0	3.90689	1.9378	1.34046
Warwick	2	0	1	1	11	9	4.18182	0.586096	3.98182	0.572161	3.87527	0.536469	4	5	2.2	1.07918	0.818182	4	0	1	1	0.69897	0.477121	0	0.30103	0.30103	1	0.146128	2	0.588302	2.32193	3.58496	1.78211	1.90068
Warwick	3	1	1	0	6	2	7.5	0.83055	3.625	0.633223	3.55067	0.538273	5	6	1	0.845098	0.333333	9	1	1	0	0.778151	0.60206	0.30103	0.30103	0	0.477121	0.176091	2.25	0.55031	2.58496	2.80736	1.78811	2.10352
